# Supplementary material for: Identification of Potential Metabolites Mediating Bird's Selective Feeding on Prunus mira Flowers
Source: Biomed Res Int. 2019 Jun 23;2019:1395480. doi: 10.1155/2019/1395480 (PMC6612375; doi:10.1155/2019/1395480)
Supplement: Supplementary Materials — Table S1: overview of the metabolites detected and quantified in two types of Prunus mira samples: preferred (FG) and avoided (BFT) flowers by birds at three different locations (J, N, and Y). Data are from three biological replicates and the mix01 to mix08 represent the mixture of sample extracts for quality check. [file 1395480.f1.xlsx]

## Sheet: Feuil1
Metabolite ID	Q1 (Da)	Q3 (Da)	Rt (min)	Molecular Weight (Da)	KEGG ID	Compounds	Class	mix01	mix02	mix03	mix04	mix05	mix06	mix07	mix08	J-BFT1	J-BFT2	J-BFT3	J-FG1	J-FG2	J-FG3	N-BFT1	N-BFT2	N-BFT3	N-FG1	N-FG2	N-FG3	Y-BFT1	Y-BFT2	Y-BFT3	Y-FG1	Y-FG2	Y-FG3
pma0104	369.1	207.5	3.72	368.1	-	N-sinapoyl hydroxycoumarin	Coumarins	829000	649000	1040000	763000	909000	920000	957000	855000	619000	623000	536000	1170000	1120000	1150000	738000	680000	622000	506000	409000	598000	665000	684000	662000	544000	380000	321000
pma0134	121	77.1	1.14	120	-	D(-)-Threose	Carbohydrates	747000	659000	638000	654000	659000	678000	653000	620000	1350000	1310000	1310000	2000000	2140000	1960000	522000	566000	571000	875000	813000	859000	427000	436000	439000	246000	302000	299000
pma0149	341.1	179.4	2.47	340.1	C02887	Sinapoyl malate	Organic acids	82300	79600	103000	100000	93200	86500	62200	82100	177000	183000	183000	123000	117000	81500	114000	111000	75400	97400	125000	118000	77100	84400	67600	97600	74600	107000
pma0214	479	317.3	3.84	478	-	methylQuercetin O-hexoside	Flavonol	2750000	1540000	2890000	2740000	2420000	2550000	3960000	2910000	2220000	2360000	1300000	1320000	1150000	1560000	4010000	2320000	3630000	3130000	1080000	2030000	2260000	794000	1700000	4680000	3780000	7680000
pma0249	479.1	302.8	3.54	478.1	-	Selgin 5-O-hexoside	Flavone	27200000	28400000	27200000	23200000	24200000	28400000	26500000	23200000	37100000	36500000	39100000	35500000	32900000	34500000	32800000	35800000	31200000	35000000	31900000	38800000	21900000	21200000	21600000	31400000	33300000	31300000
pma0253	477.1	315.5	5.27	476.1	-	O-methylChrysoeriol 5-O-hexoside	Flavone	230000	164000	192000	173000	205000	215000	180000	212000	217000	202000	223000	221000	203000	219000	303000	288000	307000	1910000	1910000	2020000	524000	466000	541000	1920000	1810000	1760000
pma0461	277.2	157.4	8.47	276.2	-	"14,15-Dehydrocrepenynic acid"	Lipids_Fatty acids	19200000	17700000	15300000	17000000	16900000	14800000	16500000	15100000	30300000	29100000	28800000	11800000	11600000	12200000	30600000	28400000	31600000	37400000	29200000	34400000	12700000	12900000	11800000	13600000	13700000	14600000
pma0675	153	135.3	3.14	152	-	o-Anisic acid	Organic acids	161000	207000	252000	194000	266000	259000	230000	251000	210000	211000	244000	341000	342000	334000	364000	355000	354000	216000	174000	164000	424000	368000	308000	186000	224000	172000
pma0724	435.1	339.7	3.74	434.1	-	Naringenin C-hexoside	Flavone C-glycosides	241000	370000	407000	389000	385000	352000	280000	390000	502000	396000	380000	292000	353000	359000	301000	266000	347000	157000	208000	219000	285000	271000	271000	302000	258000	342000
pma0760	565	317.8	4.32	564	-	Selgin O-malonylhexoside	Flavone	145000	108000	132000	140000	112000	109000	111000	116000	46500	63000	36300	28100	26100	26200	56800	72300	48800	89300	75500	66900	44300	33900	33700	93800	90000	82500
pma0825	503	255.6	5.23	502	-	Chrysin O-malonylhexoside	Flavone	1910000	1970000	1910000	1920000	2070000	2130000	1970000	1940000	3910000	4160000	4290000	1780000	1720000	1700000	1710000	1730000	1600000	904000	939000	1000000	1610000	1460000	1640000	3430000	3330000	3310000
pma0948	138.1	77.2	1.18	137.1	-	Hydroxyphenethylamine	Others	425000	385000	942000	777000	515000	527000	572000	584000	502000	496000	482000	324000	244000	266000	343000	379000	316000	442000	394000	462000	199000	218000	177000	496000	297000	268000
pma1116	301.1	259.1	3.98	300.1	C10098	Kaempferide	Flavonol	760000	760000	795000	695000	656000	733000	775000	768000	1260000	1200000	1290000	912000	889000	1050000	774000	792000	734000	2280000	1970000	1960000	1050000	1040000	1270000	2460000	2550000	2630000
pma1590	463.1	301.4	3	463.123	-	Peonidin O-hexoside	Anthocyanins	4300000	4810000	4050000	3720000	3310000	4380000	3750000	3130000	19000000	21200000	17000000	6550000	6720000	6680000	2170000	2290000	2450000	7490000	8210000	7690000	2810000	2640000	2850000	3680000	3750000	3950000
pma1751	286	124.3	2.03	285	-	Nicotinic acid-hexoside	Nicotinic acid derivatives	20400000	18600000	18200000	16700000	17700000	18300000	17400000	17500000	24900000	25900000	25300000	21700000	21400000	19400000	32500000	31600000	31800000	19400000	17400000	17500000	19500000	20300000	19800000	18800000	18500000	18300000
pma2400	167.1	121.2	2.69	166.1	-	Dihydrojasmone	Others	187000	205000	188000	205000	175000	232000	198000	217000	247000	216000	261000	91700	63700	106000	363000	429000	339000	318000	411000	343000	181000	158000	161000	169000	155000	227000
pma2681	206.1	132.4	2.2	205.1	C02470	Xanthurenic acid	Organic acids	191000	239000	260000	235000	261000	235000	247000	234000	361000	334000	340000	380000	429000	350000	321000	335000	318000	260000	299000	253000	300000	292000	279000	271000	257000	262000
pma3101	256.2	124	0.8	255.2	C05841	Nicotinate ribonucleoside	Nicotinic acid derivatives	7800000	7790000	8730000	8210000	8560000	8700000	8790000	9010000	6560000	6750000	6470000	6270000	6270000	5970000	7900000	8130000	9030000	6610000	6660000	6370000	5220000	5220000	4880000	5910000	6390000	5740000
pma3606	295.2	179.5	9.18	294.2	-	"9-Hydroxy-(10E,12Z,15Z)-octadecatrienoic acid"	Lipids_Fatty acids	5820000	5870000	5490000	5620000	5180000	3990000	5000000	4450000	6950000	7520000	7570000	4850000	6060000	5160000	7840000	8090000	7870000	11000000	9840000	10300000	8720000	8820000	7850000	5150000	5160000	5220000
pma3649	132.1	86.2	0.99	131.1	C00430	5-Aminolevulinate	Organic acids	20100000	26300000	32500000	30200000	28300000	25600000	24700000	29700000	28600000	24500000	27500000	35100000	35400000	27600000	32200000	29400000	28600000	39500000	31800000	38000000	29100000	33700000	32200000	23200000	21800000	21400000
pma3724	369.1	207.5	3.43	368.1	-	1-O-Feruloyl quinic acid	Quinate and its derivatives	3410000	3500000	3570000	3220000	3500000	3580000	3340000	3420000	2770000	2880000	2880000	2260000	2330000	2140000	4720000	4970000	4900000	3780000	3760000	4310000	2680000	2770000	2530000	4700000	4490000	4790000
pma6199	417.2	255.8	4.96	416.2	-	Chrysin O-hexoside	Flavone	4150000	3850000	3790000	3740000	3730000	3750000	3560000	3440000	2740000	2880000	2550000	2240000	2350000	2120000	2220000	2220000	2110000	6890000	6830000	6980000	2670000	2650000	2580000	8310000	8050000	7940000
pma6216	447.1	298	3.72	446.1	-	Acacetin C-hexoside	Flavone C-glycosides	795000	614000	929000	802000	775000	741000	739000	583000	0	393000	343000	172000	116000	112000	1200000	1160000	1280000	0	0	0	1880000	2000000	1860000	444000	453000	443000
pma6254	757.3	757.2	3.61	756.3	-	C-hexosyl-apigenin O-caffeoylhexoside	Flavone C-glycosides	174000	215000	218000	261000	260000	231000	205000	223000	217000	207000	158000	200000	214000	237000	193000	178000	180000	227000	182000	218000	236000	189000	199000	191000	206000	287000
pma6270	258.2	125.2	0.8	258.2	C00670	sn-Glycero-3-phosphocholine	Cholines	29000000	20600000	27800000	25200000	20900000	20300000	18400000	21600000	21000000	20200000	23500000	27200000	21300000	19100000	30700000	24100000	30400000	22300000	23500000	21600000	27200000	18600000	24200000	16800000	17800000	16600000
pma6281	145.1	74	0.73	146.1	-	Methylglutaric acid	Organic acids	18100	18800	25300	20900	18100	26400	22300	19900	9040	12600	11200	18000	19700	24800	23400	19500	17500	22200	21400	19100	26800	22400	28000	18100	19600	15600
pma6298	96	80.2	1.07	95	-	3-Hydroxypyridine	Others	153000	142000	138000	146000	161000	151000	162000	174000	174000	181000	165000	140000	119000	136000	82200	95400	103000	133000	126000	128000	173000	150000	159000	53100	47300	48900
pma6373	671.1	356	3.81	670.1	-	"3',4',5'-Dihydrotricetin O-hexosyl-O-hexoside"	Flavone	6010000	6600000	5760000	5580000	6330000	6280000	6650000	5810000	13500000	13200000	13600000	8990000	8940000	8340000	8430000	8410000	7300000	8880000	9400000	9260000	2670000	2820000	2770000	11700000	11300000	11300000
pma6460	337	275.8	3.24	338	-	5-O-p-Coumaroylquinic acid	Quinate and its derivatives	35100000	35800000	34500000	35700000	34700000	33700000	31900000	35300000	17400000	16700000	17000000	19100000	20600000	20200000	9080000	9160000	9780000	12500000	11400000	11900000	22800000	23900000	23700000	24000000	23000000	24600000
pma6496	449.1	300	3.47	448.1	-	Luteolin 6-C-glucoside	Flavone C-glycosides	361000	295000	354000	207000	366000	355000	394000	307000	452000	509000	468000	470000	394000	420000	393000	368000	512000	427000	410000	363000	309000	346000	329000	415000	367000	420000
pma6499	509.3	347.9	3.46	508.3	-	Limocitrin O-hexoside	Flavone	10800000	8970000	8750000	9570000	10000000	9580000	9450000	8080000	20700000	23200000	20100000	14000000	13900000	12800000	11700000	13200000	10900000	16200000	16100000	17400000	4340000	4730000	3950000	17700000	16400000	18800000
pma6516	757.3	450.1	3.47	756.3	-	C-hexosyl-apigenin O-hexosyl-O-hexoside	Flavone C-glycosides	647000	762000	728000	800000	616000	604000	568000	557000	822000	904000	916000	531000	788000	599000	1220000	942000	1110000	378000	613000	617000	553000	636000	668000	717000	652000	789000
pma6558	313.1	298.3	7.23	314.1	-	Velutin	Flavone	14700	15800	16800	16200	18500	17500	14400	13900	58100	67200	5970	47400	41800	53100	11200	14000	9080	11900	11300	12000	10600	8410	8070	23800	25800	18600
pma6561	341	179.2	3.01	342	-	Caffeic acid O-glucoside	Hydroxycinnamoyl derivatives	1500000	1630000	1600000	1650000	1690000	1680000	1670000	1750000	1930000	1950000	1970000	2100000	2050000	2040000	3020000	2820000	2900000	2510000	2210000	2390000	1990000	1870000	1800000	1830000	1880000	2050000
pma6586	567.3	406	3.99	566.3	-	Tricin O-glycerylhexoside	Flavone	204000	200000	223000	247000	147000	205000	227000	231000	154000	153000	172000	213000	246000	298000	224000	250000	222000	154000	173000	180000	309000	329000	346000	276000	234000	208000
pma6599	207.1	147.4	3.21	206.1	-	6-Hydroxymethylherniarin	Hydroxycinnamoyl derivatives	2080000	2040000	1980000	1920000	2000000	1890000	1880000	1900000	1830000	1820000	1780000	1290000	1190000	1240000	2220000	2080000	1960000	2270000	2470000	2340000	1590000	1580000	1520000	1990000	2140000	2090000
pma6625	405.1	242.2	4.48	406.1	-	"E-3,4,5'-Trihydroxy-3'-glucopyranosylstilbene"	Others	160000	182000	186000	200000	175000	182000	173000	164000	250000	253000	268000	139000	137000	156000	197000	192000	166000	219000	241000	205000	220000	206000	205000	125000	132000	149000
pma6638	477.2	328	5.27	476.2	-	O-methylChrysoeriol 7-O-hexoside	Flavone	232000	167000	225000	191000	130000	204000	144000	187000	174000	221000	192000	227000	204000	212000	283000	275000	276000	1920000	1910000	2040000	559000	518000	557000	1900000	1840000	1770000
pma6639	479.2	318	4.11	478.2	-	Isorhamnetin O-hexoside	Flavonol	20400000	19400000	19000000	17300000	20700000	19600000	18000000	18300000	24000000	20400000	14800000	22900000	22900000	12500000	29200000	42600000	28100000	37900000	39700000	31600000	11300000	9780000	7910000	50600000	48500000	37600000
pmb0064	374.1	198.6	2.18	373.1	C04831	DIMBOA glucoside	Others	58700	63300	52200	62100	63400	63500	45700	63900	0	0	0	0	0	0	45000	46600	42900	94600	82300	73600	22600	23600	23800	52100	58500	50500
pmb0069	122	105.3	2.31	121	C09815	Benzamide	Others	25800000	33800000	33800000	32400000	35800000	34300000	32200000	30700000	6110000	6850000	7050000	6400000	6420000	5890000	17500000	17700000	18500000	16000000	15300000	16100000	10300000	10800000	10300000	9620000	9350000	8940000
pmb0108	375.2	137.6	3.43	374.2	-	Feruloyl syringic acid	Hydroxycinnamoyl derivatives	682000	880000	944000	1050000	868000	950000	789000	850000	836000	993000	882000	1090000	905000	849000	656000	801000	823000	975000	1120000	1260000	898000	1030000	990000	986000	948000	840000
pmb0115	225.1	151.4	3.6	224.1	C02794	3-Hydroxykynurenine	Amino acid derivatives	587000	475000	372000	523000	462000	777000	744000	480000	0	0	0	21800	0	0	1930000	2320000	2220000	1570000	1480000	1250000	0	0	0	1060000	1100000	826000
pmb0142	165.1	95.5	5.99	164.1	C10945	Caffeic aldehyde	Hydroxycinnamoyl derivatives	1790000	1860000	1510000	1570000	1700000	1640000	1550000	1580000	2260000	2270000	2370000	1190000	1150000	1210000	3750000	3720000	3670000	3190000	3080000	3050000	1780000	1780000	1700000	2350000	2390000	2370000
pmb0159	696.4	696.2	7.53	695.4	-	DGMG (18:2) isomer2	Lipids_Glycerolipids	2850000	3010000	2900000	3180000	2830000	2330000	2500000	2660000	1260000	1280000	1270000	832000	850000	764000	1360000	1340000	1550000	1700000	1670000	1530000	8390000	8500000	7900000	1480000	1350000	1640000
pmb0160	353.3	261.8	7.53	352.3	-	MAG (18:3) isomer5	Lipids_Glycerolipids	36200000	35000000	30800000	32100000	33400000	31400000	34300000	30200000	14100000	14500000	14500000	8430000	8160000	8980000	16200000	15500000	16000000	18500000	18200000	18700000	84100000	82200000	79300000	14900000	15500000	15100000
pmb0161	696.4	337.8	8.05	695.4	-	DGMG (18:2) isomer1	Lipids_Glycerolipids	8740000	9940000	10200000	9390000	8650000	7100000	7680000	7750000	2210000	2140000	2220000	3300000	3310000	3000000	4950000	5120000	5690000	5760000	5640000	5330000	10400000	9830000	9520000	4340000	3990000	4080000
pmb0165	494.3	476.6	8.48	493.3	-	LysoPC 16:1	Lipids_Glycerophospholipids	202000	201000	196000	158000	91300	207000	103000	147000	54500	94200	152000	62200	105000	156000	113000	59300	104000	250000	257000	203000	87800	57400	42400	0	0	0
pmb0168	700.1	184.4	9.28	699.1	-	PC 16:1/14:1	Lipids_Glycerophospholipids	174000	202000	182000	150000	162000	146000	220000	184000	348000	323000	383000	233000	196000	206000	304000	321000	278000	349000	325000	339000	152000	124000	117000	157000	146000	127000
pmb0197	298.1	166.5	1.14	297.1	-	N2-methylguanosine	Nucleotide and its derivates	866000	977000	956000	958000	946000	987000	898000	958000	580000	677000	684000	749000	790000	771000	624000	631000	673000	965000	971000	952000	818000	798000	735000	600000	669000	649000
pmb0235	323.1	145.1	2.46	322.1	-	O-Feruloyl coumarin	Coumarins	635000	585000	541000	641000	684000	767000	696000	525000	947000	795000	1030000	1030000	1000000	916000	1030000	985000	877000	707000	728000	756000	798000	810000	694000	1040000	1010000	977000
pmb0242	310	251.6	2.96	310	C00933	Sinapoylcholine	Cholines	1180000	1240000	1120000	1140000	1110000	1160000	1060000	1030000	205000	239000	203000	1200000	1270000	1090000	729000	680000	640000	1350000	1460000	1300000	213000	219000	229000	268000	234000	232000
pmb0247	137.3	94.3	3.19	136.3	C00568	p-Aminobenzoate	Benzoic acid derivatives	1020000	742000	1010000	897000	865000	879000	897000	969000	850000	807000	862000	803000	814000	824000	1210000	1310000	1280000	1150000	1190000	1390000	1050000	990000	1140000	1620000	1740000	1790000
pmb0277	331.1	315.8	5.69	330.1	-	Tricin	Flavone	80100	69700	63900	51900	62100	58300	58800	56800	489000	425000	269000	34700	34100	28300	26900	32800	27600	21300	24000	22800	30700	23000	16900	0	0	0
pmb0292	387.1	331.8	7.59	386.1	C00187	Cholesterol	Others	1400000	1340000	1250000	1250000	1250000	1220000	1260000	1240000	1040000	1030000	1050000	1130000	1120000	1130000	649000	636000	661000	639000	630000	635000	786000	775000	785000	1350000	1310000	1360000
pmb0296	357.2	339.9	8.8	356.2	-	MAG (18:1) isomer2	Lipids_Glycerolipids	14800000	14400000	13000000	13800000	13100000	9740000	11900000	10900000	689000	665000	825000	2720000	2590000	2600000	1350000	1380000	1360000	1470000	1400000	1420000	1350000	1230000	1300000	901000	898000	902000
pmb0302	126.1	97.3	3.66	125.1	C03557	2-Aminoethylphosphonate	Others	288000	343000	320000	359000	309000	354000	313000	352000	319000	288000	252000	343000	333000	291000	364000	420000	361000	247000	279000	232000	347000	321000	334000	192000	179000	177000
pmb0374	136.1	119.3	1.89	135.1	-	Aminopurine	Others	22700000	19500000	17700000	18200000	18300000	20500000	20100000	19300000	22700000	23400000	22900000	21700000	21400000	20100000	16800000	15700000	16000000	15200000	15000000	14700000	9660000	9570000	9720000	16700000	17700000	17200000
pmb0382	339.1	177.5	3.84	338.1	-	O-Feruloyl 4-hydroxylcoumarin	Coumarins	669000	724000	824000	811000	929000	982000	647000	693000	1870000	1840000	1670000	349000	358000	415000	1010000	1240000	1340000	1390000	1300000	1150000	345000	557000	349000	785000	882000	640000
pmb0423	195.1	177.5	3.19	194.1	-	Hydroxy-methoxycinnamate	Hydroxycinnamoyl derivatives	4050000	3190000	3180000	3060000	2880000	3330000	3150000	3330000	4660000	5170000	5000000	4280000	4090000	4040000	5090000	4960000	5330000	5140000	4850000	4900000	3520000	3720000	3520000	3850000	3630000	3870000
pmb0426	219.1	189.5	3.78	218.1	C08309	"5-Methoxy-N,N-dimethyltryptamine"	Tryptamine derivatives	572000	613000	535000	613000	570000	672000	585000	541000	438000	389000	493000	501000	367000	487000	299000	368000	221000	338000	459000	267000	643000	586000	560000	420000	387000	317000
pmb0449	162.1	98.3	0.8	161.1	C00956	2-Aminoadipic acid (L-Homoglutamic acid)	Amino acids	8970000	8960000	10500000	9480000	9880000	9490000	9280000	9750000	8580000	9130000	9370000	8920000	10000000	8970000	19300000	19600000	22200000	17800000	17200000	17600000	13400000	14500000	14800000	10300000	9680000	9140000
pmb0464	458.1	116.4	0.79	457.1	-	Aspartic acid di-O-glucoside	Amino acid derivatives	5260000	4480000	4960000	4910000	4440000	3830000	4090000	4170000	4610000	4070000	3960000	3190000	3400000	2570000	3330000	3440000	3620000	3580000	3940000	4190000	2860000	2880000	2850000	3140000	2740000	3090000
pmb0484	104.1	60.2	0.74	103.1	C00114	Choline	Cholines	5980000	9220000	9900000	9650000	10000000	9290000	8960000	9390000	9960000	9710000	9920000	6730000	6700000	5260000	8550000	8780000	7880000	7350000	7280000	7680000	10300000	10400000	10100000	8070000	7050000	8130000
pmb0490	235.1	147.5	2.27	234.1	C18326	N-p-Coumaroyl putrescine	Phenolamides	912000	936000	893000	887000	910000	978000	988000	922000	986000	968000	1010000	551000	535000	534000	974000	929000	1030000	2870000	2780000	3010000	1310000	1280000	1340000	1470000	1570000	1600000
pmb0492	584.2	325.8	2.49	583.2	-	"N',N"",N""'-p-coumaroyl-cinnamoyl-caffeoyl spermidine"	Phenolamides	1330000	1310000	1380000	1330000	1280000	1310000	1360000	1400000	702000	666000	725000	626000	568000	530000	639000	686000	617000	870000	752000	836000	493000	503000	418000	608000	535000	614000
pmb0493	277.2	260.8	2.55	276.2	-	N'-p-Coumaroyl agmatine	Phenolamides	149000	154000	144000	119000	115000	106000	104000	87400	108000	164000	178000	76800	87100	109000	183000	166000	173000	365000	334000	340000	158000	181000	124000	232000	210000	233000
pmb0500	411.1	177.5	4.74	410.1	-	"N',N""-p-coumaroyl-feruloyl putrescine"	Phenolamides	4060000	4220000	4200000	4320000	4260000	4350000	4030000	4020000	7800000	7110000	6400000	8050000	8050000	6690000	2670000	2960000	2950000	11100000	10600000	8940000	4350000	4300000	3610000	10600000	11000000	10100000
pmb0501	131.1	72.1	0.64	130.1	C00179	Agmatine	Phenolamides	482000	629000	631000	630000	602000	639000	591000	664000	575000	616000	641000	603000	492000	506000	465000	394000	509000	993000	1090000	1100000	448000	531000	533000	211000	285000	271000
pmb0502	292.1	147.5	1.82	291.1	-	N-p-Coumaroyl spermidine	Phenolamides	1240000	866000	497000	751000	871000	713000	488000	1240000	0	0	0	0	0	0	1150000	866000	1150000	1730000	1990000	2190000	1350000	1270000	1310000	2380000	2520000	2590000
pmb0505	235.1	147.4	2.27	234.1	-	N'-p-Coumaroyl putrescine	Phenolamides	849000	834000	866000	882000	838000	887000	889000	899000	944000	906000	894000	504000	498000	469000	920000	927000	983000	2660000	2690000	2690000	1270000	1140000	1160000	1470000	1440000	1340000
pmb0514	348.1	136.4	0.85	347.1	C01367	Adenosine 3'-monophosphate	Nucleotide and its derivates	24200000	21900000	19000000	20900000	22800000	21900000	21800000	17200000	22000000	23100000	23400000	25800000	26300000	24600000	22900000	17800000	26300000	18000000	18800000	17600000	47600000	53200000	46700000	16100000	16600000	16500000
pmb0532	349.1	137.4	1.13	348.1	C00130	Inosine 5'-monophosphate	Nucleotide and its derivates	7260000	6810000	6980000	7200000	8170000	7770000	8600000	7660000	7760000	8470000	8270000	8490000	7530000	8130000	7480000	8210000	7620000	5850000	6490000	6380000	19000000	17100000	16800000	5950000	5450000	4870000
pmb0541	697.1	696.9	2.24	697.1	-	Cyanidin 3-O-glucosyl-malonylglucoside	Anthocyanins	82400	109000	95300	92800	98900	95300	98400	104000	0	0	0	0	0	0	0	0	0	0	0	0	0	0	0	0	0	0
pmb0545	477.1	315.6	3.31	477.1	-	Rosinidin O-hexoside	Anthocyanins	770000	958000	1170000	911000	833000	851000	744000	859000	969000	801000	811000	805000	665000	768000	1310000	1270000	1820000	1310000	1360000	1310000	501000	549000	459000	1370000	1120000	1190000
pmb0563	301.1	273.6	3.98	301.1	C08726	Peonidin	Anthocyanins	464000	469000	456000	407000	466000	413000	444000	457000	779000	714000	755000	582000	554000	557000	387000	449000	400000	1300000	1120000	1160000	596000	668000	652000	1740000	1550000	1830000
pmb0565	509.1	347.7	3.36	508.1	-	Syringetin 3-O-hexoside	Flavonol	9730000	10500000	9960000	9080000	11800000	9980000	10300000	9110000	22500000	24000000	21700000	15600000	17700000	14100000	14400000	15300000	12800000	17300000	18800000	15600000	4620000	5640000	4850000	17000000	16900000	19100000
pmb0569	509.2	347.6	4.01	508.2	-	Syringetin 5-O-hexoside	Flavone	13600000	13200000	14000000	13300000	13100000	11400000	13300000	12700000	44300000	35300000	26700000	38300000	35400000	22100000	18300000	23900000	26500000	22100000	25100000	17400000	11700000	10100000	7870000	42900000	38500000	39300000
pmb0578	655	287.7	4.59	654	-	Luteolin O-sinapoylhexoside	Flavone	2200000	2380000	2120000	2210000	2300000	2460000	2370000	2300000	2630000	2320000	1950000	2670000	2540000	2150000	2390000	2510000	2470000	2730000	2550000	2760000	2200000	2180000	1920000	2160000	2160000	2150000
pmb0580	417.1	255.7	4.95	416.1	-	Chrysin 5-O-glucoside (Toringin)	Flavone	4020000	3980000	3830000	3830000	3860000	4160000	3660000	3650000	2490000	2840000	2850000	2260000	2330000	2130000	2230000	2160000	2170000	6720000	7040000	7110000	2720000	2780000	2710000	8610000	8420000	8320000
pmb0588	611.1	449.4	3.38	610.1	-	"Luteolin 3',7-di-O-glucoside"	Flavone	3130000	3070000	3130000	3330000	3350000	3390000	3640000	3490000	2200000	2130000	1960000	2020000	1940000	1900000	2320000	2220000	2190000	1500000	1580000	1570000	1500000	1350000	1390000	1840000	1960000	2090000
pmb0595	479.2	317.8	4	478.2	-	Isorhamnetin 5-O-hexoside	Flavonol	1290000	1800000	1270000	2360000	1100000	1760000	2160000	1430000	2160000	2500000	2450000	1090000	1380000	1550000	3840000	3020000	3850000	2260000	1310000	2800000	1730000	1330000	2510000	6700000	3600000	3140000
pmb0602	509.3	283.6	4.1	508.3	-	Syringetin 7-O-hexoside	Flavone	11700000	11400000	12200000	12000000	12400000	10600000	11700000	10700000	37900000	33400000	20800000	32500000	32800000	20100000	16700000	23200000	20200000	17700000	22400000	15300000	8660000	8520000	5360000	36900000	34700000	26600000
pmb0603	625.1	331.7	4.12	624.1	-	Chrysoeriol O-hexosyl-O-hexoside	Flavone	517000	493000	387000	444000	496000	467000	507000	508000	529000	600000	607000	374000	405000	335000	731000	902000	699000	532000	656000	716000	426000	519000	543000	1030000	766000	969000
pmb0604	449.1	287.6	4.05	448.1	C12249	Kaempferol 3-O-glucoside (Astragalin)	Flavonol	2730000	2480000	2590000	2550000	2690000	2570000	2580000	2700000	1930000	1920000	1680000	3380000	3600000	2830000	2340000	2610000	2540000	2990000	2890000	2380000	1440000	1690000	1310000	2500000	2730000	2320000
pmb0605	433.1	271.7	4.15	432.1	C04608	Apigenin 7-O-glucoside (Cosmosiin)	Flavone	2660000	2730000	2500000	2300000	2590000	2720000	2450000	2340000	2690000	2500000	2060000	1840000	1590000	1090000	2290000	2890000	2810000	2340000	2540000	2290000	2080000	1970000	1530000	3560000	3680000	3060000
pmb0607	463.2	287.7	4.25	462.2	-	Chrysoeriol 7-O-hexoside	Flavone	4310000	4010000	4280000	4170000	4320000	4480000	4210000	3940000	4730000	4450000	3800000	5310000	4450000	2780000	5230000	7200000	6490000	6710000	6870000	4720000	7080000	6410000	5390000	7660000	7520000	5650000
pmb0615	789.1	789.1	2.63	788.1	-	Hesperetin C-hexosyl-O-hexosyl-O-hexoside	Flavone C-glycosides	500000	592000	470000	486000	560000	592000	573000	545000	829000	800000	855000	76900	79000	70200	596000	692000	531000	370000	371000	328000	0	0	0	74600	61500	74700
pmb0618	627.1	430	2.76	626.1	-	8-C-hexosyl-hesperetin O-hexoside	Flavone C-glycosides	10000000	11900000	10400000	12100000	10800000	10400000	9840000	9850000	11600000	11400000	12600000	3480000	3410000	3590000	17900000	18300000	17100000	9180000	9130000	9280000	4660000	4450000	4650000	7200000	6600000	7960000
pmb0619	775.1	774.9	2.58	774.1	-	Eriodictiol 6-C-hexoside 8-C-hexoside-O-hexoside	Flavone C-glycosides	874000	845000	779000	806000	756000	952000	866000	814000	1040000	1110000	1130000	208000	218000	192000	1030000	1070000	998000	396000	394000	476000	678000	683000	759000	352000	311000	374000
pmb0621	641.1	623	2.9	640.1	-	C-hexosyl-isorhamnetin O-hexoside	Flavone C-glycosides	846000	717000	514000	562000	610000	629000	697000	486000	319000	299000	277000	476000	515000	525000	514000	409000	402000	586000	490000	412000	384000	458000	439000	744000	750000	761000
pmb0624	611.1	329	3.05	610.1	-	6-C-hexosyl-luteolin O-hexoside	Flavone C-glycosides	296000	250000	232000	218000	225000	248000	262000	225000	151000	256000	147000	133000	129000	126000	271000	277000	243000	175000	161000	198000	115000	135000	154000	127000	102000	91700
pmb0626	757.1	757	2.94	756.1	-	6-C-hexosyl-apigenin O-hexosyl-O-hexoside	Flavone C-glycosides	288000	312000	259000	321000	356000	301000	308000	309000	64900	85500	81600	38400	41800	47900	136000	152000	138000	44600	52600	73100	49800	53100	56400	41200	39600	36200
pmb0628	613.1	300.3	3.04	612.1	-	Eriodictiol C-hexosyl-O-hexoside	Flavone C-glycosides	1720000	2340000	1890000	2000000	2050000	2310000	2090000	1910000	2740000	2780000	2290000	1700000	1770000	1610000	3090000	3180000	2920000	1740000	1700000	1760000	1510000	1330000	1360000	2160000	1760000	2040000
pmb0639	757.2	757	3.05	756.2	-	8-C-hexosyl-apigenin O-hexosyl-O-hexoside	Flavone C-glycosides	1200000	1400000	1340000	1310000	1400000	1460000	1460000	1410000	948000	789000	876000	503000	525000	436000	1630000	1440000	1530000	378000	424000	461000	648000	797000	728000	371000	331000	504000
pmb0644	449.1	329.6	3.42	448.1	-	Luteolin C-hexoside	Flavone C-glycosides	143000	106000	110000	118000	70500	129000	145000	96000	0	0	0	0	0	0	0	0	0	71200	84500	105000	0	0	0	62900	67600	58400
pmb0645	627.1	447.3	3.37	626.1	-	6-C-hexosyl-hesperetin O-hexoside	Flavone C-glycosides	26700000	29800000	27300000	27900000	28900000	29900000	29700000	27500000	29400000	27700000	29300000	22800000	22600000	21800000	19600000	17900000	16200000	17900000	18300000	19000000	11700000	12000000	12400000	56500000	56100000	62000000
pmb0647	581.1	449.2	3.38	580.1	-	8-C-hexosyl-luteolin O-pentoside	Flavone C-glycosides	246000	281000	324000	209000	250000	247000	276000	227000	455000	404000	380000	239000	279000	263000	284000	307000	216000	198000	135000	196000	320000	294000	366000	365000	446000	448000
pmb0661	609.1	463.4	3.78	608.1	-	Chrysoeriol C-hexosyl-O-rhamnoside	Flavone C-glycosides	2180000	2080000	2070000	1650000	2060000	2370000	2180000	2050000	3290000	3300000	3450000	1770000	1690000	1610000	2360000	2460000	2210000	2090000	2030000	2000000	3420000	3740000	3800000	1900000	1980000	2030000
pmb0662	787.2	733.2	3.67	786.2	-	C-hexosyl-luteolin O-feruloylhexoside	Flavone C-glycosides	0	86400	78100	111000	97400	116000	87400	56800	121000	166000	145000	93000	108000	103000	175000	196000	183000	121000	101000	109000	182000	220000	215000	115000	140000	128000
pmb0663	611.1	299.8	3.71	610.1	-	8-C-hexosyl-luteolin O-hexoside	Flavone C-glycosides	1170000	1500000	1290000	1210000	1180000	1450000	1150000	1250000	2710000	2940000	2620000	2150000	2050000	1860000	2130000	2420000	2330000	2320000	2730000	2590000	979000	731000	657000	2550000	2310000	2410000
pmb0665	611.2	299.8	3.67	610.2	-	Luteolin 8-C-hexosyl-O-hexoside	Flavone C-glycosides	2480000	2560000	2340000	2330000	2650000	2860000	2650000	2810000	2040000	1940000	2000000	2350000	2490000	2390000	2170000	2130000	1910000	2420000	2650000	2500000	2500000	2540000	2430000	2280000	2060000	2010000
pmb0684	655.2	655	4.37	654.2	-	C-hexosyl-luteolin O-sinapic acid	Flavone C-glycosides	435000	374000	433000	569000	378000	409000	398000	339000	385000	415000	273000	560000	404000	499000	415000	389000	454000	508000	463000	476000	380000	384000	271000	317000	354000	280000
pmb0686	537	289.7	4.48	536	-	Eriodictyol O-malonylhexoside	Flavanone	415000	461000	430000	382000	415000	444000	477000	424000	291000	262000	300000	202000	229000	184000	388000	414000	320000	416000	405000	416000	354000	388000	393000	466000	422000	390000
pmb0691	757.1	757	3.06	756.1	-	Luteolin C-hexosyl-O-rhamnoside O-hexoside	Flavone C-glycosides	112000	169000	145000	121000	145000	150000	139000	153000	89200	104000	99500	48900	61000	78500	170000	144000	118000	40400	53600	96500	105000	78100	103000	51600	48600	69300
pmb0711	611.2	303.7	3.64	610.2	-	Quercetin 7-O-rutinoside	Flavonol	29600000	29700000	28700000	28700000	29700000	30400000	31700000	29700000	22300000	21800000	21300000	27400000	26600000	24300000	24800000	24900000	24400000	29200000	29200000	29200000	27500000	27900000	28700000	24200000	22800000	24700000
pmb0713	655.2	331.7	3.45	654.2	-	Tricin 7-O-hexosyl-O-hexoside	Flavone	107000	96000	78000	86600	107000	98200	106000	99900	97100	92300	120000	65900	65700	54300	129000	179000	106000	114000	121000	62000	99400	106000	77600	165000	115000	134000
pmb0716	655.2	331.7	4.11	654.2	-	Tricin di-O-hexoside	Flavone	172000	208000	206000	162000	181000	167000	165000	163000	416000	300000	297000	121000	86400	81500	293000	266000	279000	435000	520000	463000	98100	130000	111000	221000	234000	195000
pmb0736	493.1	331.8	4.24	492.1	-	Tricin 7-O-hexoside	Flavone	393000	322000	322000	318000	377000	352000	337000	309000	778000	714000	458000	644000	613000	417000	556000	847000	767000	390000	391000	305000	426000	383000	328000	714000	620000	543000
pmb0749	369.1	177.5	2.25	368.1	-	O-Feruloyl quinic acid	Quinate and its derivatives	692000	649000	694000	628000	635000	667000	714000	648000	407000	393000	375000	441000	468000	354000	848000	810000	828000	1170000	1110000	1150000	777000	727000	793000	1480000	1460000	1450000
pmb0751	321.1	147.5	3.78	320.1	-	5-O-p-Coumaroyl shikimic acid	Quinate and its derivatives	2390000	2430000	2750000	2470000	2430000	2470000	2210000	2300000	1880000	1620000	1660000	2230000	1940000	2160000	1690000	1630000	1820000	2360000	2250000	2770000	3480000	3830000	3580000	2990000	2860000	3110000
pmb0752	369.1	177.5	2.99	368.1	C02572	3-O-Feruloyl quinic acid	Quinate and its derivatives	2740000	3360000	3280000	3070000	3000000	2920000	3200000	3210000	0	0	0	0	0	0	10900000	10300000	10200000	0	0	0	0	0	0	14300000	14100000	14300000
pmb0764	144.1	142.9	2.62	143.1	C04294	4-Methyl-5-thiazoleethanol	Others	302000	362000	317000	330000	332000	305000	308000	322000	261000	284000	256000	205000	221000	204000	362000	305000	281000	233000	231000	270000	238000	229000	248000	170000	154000	151000
pmb0769	485.1	147.5	3.78	484.1	-	N-hexosyl-p-coumaroyl serotonin	Tryptamine derivatives	443000	427000	371000	432000	378000	398000	441000	308000	241000	348000	332000	434000	416000	412000	380000	381000	281000	394000	385000	445000	333000	365000	400000	324000	393000	428000
pmb0782	86.1	56	1.16	85.1	C01746	Piperidine	Alkaloids	14200000	15700000	13100000	15200000	14500000	14500000	14700000	13900000	14500000	14000000	13700000	16700000	17400000	14300000	19000000	18800000	17000000	19400000	20500000	20700000	15600000	14700000	16100000	13500000	13300000	14000000
pmb0786	180	84.2	0.61	179	C00329	Glucosamine	Carbohydrates	20500000	21400000	36700000	23800000	23200000	27100000	20000000	23600000	21500000	29000000	24000000	16400000	20600000	24300000	21200000	14500000	25700000	24900000	27700000	17300000	30200000	31200000	20900000	27000000	29900000	20900000
pmb0789	332.1	314.7	1.14	331.1	-	Pyridoxine O-glucoside	Vitamins	8590000	8670000	8530000	8700000	8750000	9110000	9040000	8150000	3230000	3550000	3960000	4600000	4440000	4460000	4950000	4560000	4910000	2790000	3000000	2950000	9930000	9820000	9750000	4610000	5030000	4730000
pmb0800	123.1	80.3	1.49	122.1	C00153	Niacinamide	Vitamins	42800000	44100000	41700000	40900000	43300000	45100000	45600000	42800000	38300000	38500000	38000000	38600000	37100000	34200000	35500000	34800000	34100000	33300000	32200000	33400000	35000000	34700000	35000000	30300000	31600000	31100000
pmb0802	220.2	202.7	2.28	219.2	C00864	D-Pantothenic acid	Vitamins	4140000	5070000	4840000	4750000	5080000	5450000	4940000	5280000	7180000	7070000	7020000	5320000	5220000	4980000	6120000	6080000	6170000	5760000	5270000	5970000	5280000	4960000	5310000	6190000	6860000	6420000
pmb0808	353.1	272.8	2.81	352.1	-	"6,7-dihydroxycoumarin 6-O-quinic acid"	Coumarins	11500000	8070000	7560000	7590000	8060000	7330000	7070000	5010000	4500000	4280000	5850000	7090000	7020000	8320000	7530000	6950000	8030000	7360000	6880000	6990000	7880000	8000000	7910000	7400000	9280000	8070000
pmb0812	127.1	81.2	2.82	126.1	C02835	Imidazole-4-acetate	Indole derivatives	899000	860000	1050000	1180000	1050000	882000	1240000	955000	676000	739000	704000	1230000	1130000	1190000	1250000	1130000	1120000	816000	842000	839000	845000	763000	688000	1560000	1470000	1560000
pmb0818	206.1	147.5	2.48	205.1	C05660	Methoxyindoleacetic acid	Indole derivatives	36600000	40700000	40100000	36700000	42000000	41600000	37800000	39200000	29800000	30600000	31900000	56900000	57400000	56500000	47700000	49000000	51500000	34100000	31800000	32600000	49300000	54400000	49000000	27400000	26300000	25400000
pmb0819	157	130.4	2.45	156	C02938	3-Indoleacetonitrile	Indole derivatives	2640000	2340000	2220000	2240000	2170000	1560000	1770000	845000	489000	999000	1210000	2630000	2490000	3280000	3380000	3220000	3310000	2270000	2280000	2280000	2830000	3110000	2740000	1260000	1460000	1050000
pmb0824	537.1	177.5	2.54	536.1	-	Syringic acid O-feruloyl-O-hexoside	Benzoic acid derivatives	270000	329000	396000	365000	286000	269000	271000	291000	270000	270000	322000	212000	193000	183000	412000	382000	409000	513000	582000	543000	244000	311000	271000	415000	348000	403000
pmb0829	98.9	81.1	0.89	97.9	C00009	Phosphoric acid	Organic acids	4720000	4770000	4310000	4540000	4890000	4480000	4630000	4340000	5920000	5500000	6110000	4720000	4600000	4510000	6500000	6630000	5980000	6490000	6320000	6220000	3990000	4040000	5020000	5430000	6290000	5780000
pmb0835	611.2	611.1	2.38	610.2	-	Gallocatechin-gallocatechin	Catechin derivatives	3500000	4330000	5680000	3090000	4910000	4500000	6230000	4580000	7610000	7020000	8800000	3010000	2040000	3180000	2620000	3170000	2490000	22300000	21900000	21200000	4960000	3870000	4130000	3320000	5500000	3730000
pmb0837	577.1	425.4	2.87	576.1	-	Procyanidin A3	Proanthocyanidins	15300000	11300000	11300000	10700000	10400000	9890000	9850000	8370000	5610000	5280000	5450000	9150000	9470000	9510000	5660000	6460000	8090000	10500000	10200000	8290000	10500000	7310000	8340000	11900000	14400000	13200000
pmb0848	494.3	184.6	7.82	493.3	-	LysoPC 16:1 (2n isomer)	Lipids_Glycerophospholipids	6640000	6390000	5830000	6620000	6370000	5640000	5780000	5990000	6850000	6520000	6000000	3060000	2990000	2940000	3290000	3370000	3200000	8770000	8700000	8440000	27200000	28000000	25500000	3900000	3960000	3840000
pmb0852	520.3	502.3	8.36	519.3	-	LysoPC 18:2	Lipids_Glycerophospholipids	10400000	8600000	7210000	7670000	8460000	7260000	6970000	7140000	4760000	5340000	5460000	6950000	7500000	6360000	5750000	5550000	5920000	8330000	7170000	7720000	8760000	9720000	9900000	6970000	6520000	6240000
pmb0854	518.3	459.6	8.74	517.3	-	LysoPC 18:3	Lipids_Glycerophospholipids	31500000	25500000	25800000	25500000	25700000	21600000	23300000	18000000	13700000	15400000	15800000	27400000	26900000	32500000	24500000	23600000	25500000	31900000	28900000	30800000	16700000	15900000	15100000	29400000	30400000	29000000
pmb0855	496.3	478.3	8.74	495.3	-	LysoPC 16:0	Lipids_Glycerophospholipids	3500000	3150000	3180000	2880000	2910000	2820000	2810000	2640000	1950000	1940000	1840000	2740000	2630000	2490000	2220000	2250000	2220000	2990000	3140000	2970000	2190000	2180000	1990000	2650000	2530000	2740000
pmb0859	522.4	184.5	8.86	521.4	-	LysoPC 18:1 (2n isomer)	Lipids_Glycerophospholipids	1960000	2240000	2000000	2110000	1820000	1850000	1840000	1920000	1380000	1260000	1250000	1730000	1660000	1600000	924000	776000	828000	2520000	2440000	2520000	6400000	6870000	6890000	1820000	1810000	1680000
pmb0862	440.1	422.7	6.71	439.1	-	LysoPC 12:1	Lipids_Glycerophospholipids	242000	243000	241000	242000	249000	254000	232000	245000	21300	23900	24600	45200	39000	42600	26600	23300	17600	46800	51900	58200	38100	39800	38000	28100	30200	28600
pmb0863	492.3	184.5	7.29	491.3	-	LysoPC 16:2 (2n isomer)	Lipids_Glycerophospholipids	3340000	3090000	3080000	3100000	3110000	3140000	2980000	2950000	3250000	3330000	3360000	1100000	1130000	1090000	2190000	2070000	2100000	6210000	6040000	6150000	13000000	12800000	13300000	1820000	1730000	1780000
pmb0864	426.3	285.8	7.63	425.3	-	LysoPE 14:0	Lipids_Glycerophospholipids	1900000	1720000	1610000	1650000	1690000	1560000	1590000	1540000	1090000	1100000	1100000	2150000	2100000	2140000	1100000	1100000	1130000	1670000	1580000	1610000	1130000	1110000	1090000	1660000	1740000	1690000
pmb0865	518.2	500.3	7.67	517.2	-	LysoPC 18:3 (2n isomer)	Lipids_Glycerophospholipids	15300000	14300000	14500000	14000000	13900000	14200000	13100000	12100000	19200000	20200000	18500000	8030000	7810000	7360000	11200000	10500000	10500000	21700000	21900000	21500000	43300000	41500000	37100000	11300000	12100000	12600000
pmb0866	468.1	450.5	7.68	467.1	-	LysoPC 14:0	Lipids_Glycerophospholipids	5490000	5290000	5150000	5260000	5350000	5360000	5450000	5270000	3520000	3430000	3470000	5400000	5040000	5110000	3430000	3550000	3400000	4600000	4860000	4680000	3930000	4140000	4030000	4570000	4420000	4640000
pmb0873	520	125	8.19	519	-	LysoPC 18:2 (2n isomer)	Lipids_Glycerophospholipids	1730000	1540000	1530000	1530000	1490000	1630000	1300000	1380000	1640000	1770000	1740000	1110000	989000	964000	1200000	1320000	1200000	2390000	2420000	2470000	4310000	4790000	4290000	1390000	1360000	1270000
pmb0874	478.6	337.9	8.32	477.6	-	LysoPE 18:2 (2n isomer)	Lipids_Glycerophospholipids	8730000	7140000	6120000	7020000	6890000	6140000	6440000	6130000	3730000	4110000	3950000	7620000	7140000	7710000	5000000	4770000	5190000	6820000	6620000	7780000	6980000	6820000	6360000	6110000	6310000	5920000
pmb0877	480.1	339.9	8.8	479.1	-	LysoPE 18:1	Lipids_Glycerophospholipids	799000	738000	689000	785000	775000	646000	672000	604000	571000	688000	631000	940000	965000	956000	433000	490000	436000	1770000	1690000	1870000	2160000	2340000	2110000	865000	959000	903000
pmb0882	522.1	125.5	9.04	521.1	-	LysoPC 18:1	Lipids_Glycerophospholipids	21700000	18800000	21400000	19000000	18800000	18300000	17600000	17300000	7800000	8290000	6890000	17900000	16900000	19200000	7900000	6980000	7020000	18300000	18300000	15600000	26300000	23200000	17100000	15300000	14300000	15600000
pmb0883	482.1	341.9	9.8	481.1	-	LysoPE 18:0	Lipids_Glycerophospholipids	1180000	1040000	1100000	1060000	1000000	596000	824000	755000	761000	710000	921000	1330000	1370000	1350000	1880000	1910000	1720000	2340000	2010000	2490000	1240000	1270000	991000	1460000	1680000	1680000
pmb0885	291	273.9	6.65	290	-	"4-oxo-9Z,11Z,13E,15E-octadecatetraenoic acid"	Lipids_Fatty acids	146000	143000	124000	150000	148000	133000	144000	135000	87900	76700	69100	52700	50300	53400	48000	59200	50300	92000	88300	80400	66300	50000	44500	52000	52200	52700
pmb0889	279.3	201.5	8.91	278.3	C08364	Punicic acid	Lipids_Fatty acids	33900000	31000000	27900000	27900000	32100000	24300000	26700000	23500000	45100000	51600000	48900000	24600000	23800000	22400000	69500000	61800000	58700000	81300000	77200000	80200000	30400000	28700000	25400000	34900000	36800000	32400000
pmb0890	355.1	337.9	10.45	354.1	-	MAG (18:2)	Lipids_Glycerolipids	13100000	13000000	12600000	12100000	9980000	6820000	8820000	10100000	20000000	16000000	20700000	17800000	19700000	19200000	20100000	21100000	20600000	31100000	22300000	27200000	69000000	70200000	56600000	18700000	17900000	19600000
pmb0962	235.1	118.4	0.77	234.1	-	Lysine butyrate	Amino acid derivatives	406000	390000	384000	335000	395000	357000	422000	321000	391000	341000	328000	453000	670000	529000	677000	593000	798000	609000	648000	663000	424000	385000	449000	300000	305000	232000
pmb1096	118	58.2	2.47	117	C00463	Indole	Indole derivatives	39300000	36800000	34900000	35400000	38300000	38000000	38100000	36500000	30300000	29700000	29700000	50900000	52500000	49600000	46700000	46100000	46700000	34700000	32500000	32900000	43700000	43300000	43600000	25600000	27400000	26200000
pmb1178	339.1	177.5	3.21	338.1	-	O-Feruloyl 2-hydroxylcoumarin	Coumarins	20000000	20100000	19700000	19100000	20000000	19900000	18000000	18800000	12400000	12700000	12900000	8930000	9210000	9090000	14400000	13600000	14500000	16900000	16400000	17500000	12200000	11800000	12800000	15400000	14400000	15500000
pmb1240	503.2	311.8	3.74	502.2	-	Phellodensin F	Others	25000000	23700000	21900000	23600000	23600000	24700000	23800000	21800000	18300000	17900000	19200000	19900000	20600000	20500000	19100000	19200000	17400000	23500000	23900000	26600000	20900000	22700000	22900000	19300000	19000000	20300000
pmb1283	448.1	215.7	4.12	447.1	-	L-Glutaminyl-L-valyl-L-valyl-L-cysteine	Amino acid derivatives	82300	94200	100000	71800	105000	74200	67300	72600	59400	58800	39900	37800	38000	14800	26300	44800	71400	63200	47400	38500	68500	88100	57800	42600	57900	50500
pmb1318	457.2	191.5	4.51	456.2	-	8-Methyl-2-oxo-4-phenyl-2H-chromen-7-yl 4-(hexyloxy)benzoate	Benzoic acid derivatives	7790000	7620000	7930000	7420000	7170000	7690000	6250000	8040000	9940000	9520000	8360000	8660000	7930000	7050000	7170000	8010000	8320000	4870000	5150000	5210000	5430000	4990000	4800000	5900000	5830000	5810000
pmb1530	317.1	299.9	7.28	316.1	-	Phytocassane D	Terpenoids	159000	138000	126000	128000	118000	120000	127000	113000	45900	55300	77000	33000	34300	32900	32000	40300	36200	50600	67800	59200	65100	49000	58400	41400	40500	41200
pmb1574	277.2	137.5	8.04	276.2	-	Octadecadien-6-ynoic acid	Lipids_Fatty acids	4020000	3730000	3620000	3430000	3760000	3340000	3680000	3350000	5600000	6030000	5830000	2540000	2460000	2590000	5180000	4700000	5580000	5570000	5530000	6420000	1940000	1880000	1810000	3830000	3550000	3150000
pmb1587	207.2	165.5	8.33	206.2	-	"4-Hydroxy-3,5-diisopropylbenzaldehyde"	Benzoic acid derivatives	65500	49600	49300	51600	54300	48100	38800	33700	50700	73100	71700	38400	36400	37100	89300	98700	95600	79000	83600	89700	51900	40500	43200	78700	67300	70100
pmb1605	353.3	335.8	8.55	352.3	-	MAG (18:3) isomer3	Lipids_Glycerolipids	25700000	25600000	23400000	25700000	24400000	20900000	22600000	20900000	13900000	14900000	15500000	7890000	7910000	8280000	20900000	20200000	21000000	20300000	19300000	19400000	65100000	78900000	66300000	14900000	16100000	16000000
pmb1626	534.4	262.9	9.15	533.4	-	MGMG (18:2) isomer1	Lipids_Glycerolipids	428000	468000	476000	502000	393000	256000	382000	343000	570000	603000	660000	689000	698000	717000	1040000	1090000	1190000	1400000	947000	1360000	1810000	1560000	1840000	1090000	1240000	1050000
pmb1650	279.2	149.4	9.64	278.2	-	"Octadeca-11E,13E,15Z-trienoic acid"	Lipids_Fatty acids	13900000	10400000	9910000	9590000	8580000	4790000	8590000	8110000	7790000	6500000	8880000	5880000	6200000	7160000	10500000	9930000	11200000	8700000	6490000	8510000	4480000	4400000	3440000	10600000	11400000	11000000
pmb1652	149	121.3	9.64	148	-	Phthalic anhydride	Others	20100000	17400000	17100000	16800000	16400000	6230000	15800000	15300000	16400000	12900000	20400000	13300000	10500000	14700000	22600000	20400000	23200000	17600000	11100000	16900000	9170000	8930000	6300000	23700000	23900000	24600000
pmb1656	353.1	173.7	9.85	352.1	-	MAG (18:3) isomer4	Lipids_Glycerolipids	716000	614000	623000	584000	628000	166000	699000	557000	1440000	731000	1430000	936000	990000	961000	933000	1110000	1170000	1550000	719000	1520000	3890000	3740000	1930000	1060000	1180000	1090000
pmb1754	184	83.2	0.78	183	C00588	O-Phosphocholine	Cholines	5950000	6230000	4120000	4520000	4830000	4290000	5040000	4790000	5200000	6470000	7100000	5300000	5790000	5620000	9940000	10600000	10300000	8620000	6350000	6100000	4580000	5590000	6140000	4920000	7200000	4050000
pmb1912	474.2	327.8	2.42	473.2	C00234	10-Formyl-THF	Others	13000000	13100000	13200000	13800000	13900000	15000000	14300000	13400000	18500000	18300000	17700000	15200000	15000000	13500000	16900000	16900000	15800000	9180000	9470000	9020000	11900000	10900000	11400000	11800000	10900000	11000000
pmb2211	343.1	240.9	6.53	342.1	-	Cocamidopropyl betaine	Others	1330000	1350000	1340000	1360000	1330000	1290000	1350000	1250000	1740000	1660000	1600000	1510000	1480000	1980000	1140000	1230000	1390000	1440000	1300000	1340000	873000	894000	901000	1040000	956000	964000
pmb2228	538.1	184.5	6.87	537.1	-	LysoPC 19:0	Lipids_Glycerophospholipids	246000	265000	231000	235000	225000	194000	247000	163000	175000	159000	184000	84600	67000	69800	150000	104000	97300	277000	340000	446000	404000	412000	386000	118000	107000	86300
pmb2251	694.1	335.8	7.53	693.1	-	DGMG (18:1)	Lipids_Glycerolipids	16000000	16500000	16600000	16500000	15900000	13400000	15400000	14200000	6970000	7240000	7230000	4610000	4600000	4700000	7780000	8090000	8880000	9690000	9000000	9310000	45200000	44200000	42700000	7740000	7720000	8560000
pmb2260	480.1	184.5	7.66	479.1	-	LysoPC 15:1	Lipids_Glycerophospholipids	68300	64400	60000	67200	71500	57200	62200	67700	37900	45300	50900	55400	61000	49800	60000	66100	64300	46000	52900	44800	0	0	0	39500	48500	42300
pmb2319	482.3	184.5	8.2	481.3	-	LysoPC 15:0	Lipids_Glycerophospholipids	5920000	5710000	5610000	5340000	5640000	5610000	5360000	5310000	3670000	3560000	3670000	3940000	3700000	3780000	5690000	5820000	5630000	6050000	5750000	5850000	2660000	2500000	2630000	4010000	4010000	3930000
pmb2325	353.1	261.8	8.33	352.1	-	MAG (18:3) isomer2	Lipids_Glycerolipids	4790000	3840000	4330000	4740000	4020000	3660000	3720000	3390000	2560000	2710000	2780000	1400000	1290000	1480000	3680000	3720000	3790000	3590000	3190000	3160000	15600000	12800000	13200000	2600000	2920000	2560000
pmb2363	357.2	339.9	8.69	356.2	-	MAG (18:1) isomer1	Lipids_Glycerolipids	224000	196000	174000	189000	169000	125000	173000	163000	87300	63400	58000	188000	177000	177000	280000	289000	302000	353000	322000	344000	454000	452000	396000	231000	240000	219000
pmb2383	534.1	338	8.99	533.1	-	MGMG (18:2) isomer2	Lipids_Glycerolipids	164000	168000	183000	188000	164000	105000	140000	132000	152000	145000	171000	151000	158000	153000	310000	308000	342000	406000	340000	389000	1130000	1270000	1030000	254000	269000	270000
pmb2388	524.1	507.4	8.84	523.1	-	LysoPC 18:0 (2n isomer)	Lipids_Glycerophospholipids	4880000	4860000	4310000	4460000	4310000	4470000	4450000	4120000	3020000	2840000	3020000	3870000	3750000	3710000	1790000	1850000	1740000	5540000	5290000	5510000	16000000	16200000	15300000	4080000	3910000	3980000
pmb2406	510.1	510.4	9.29	509.1	-	LysoPC 17:0	Lipids_Glycerophospholipids	4660000	4770000	4700000	4370000	4370000	4350000	4720000	3790000	3340000	3630000	3550000	3620000	3520000	3380000	5320000	5340000	4390000	7130000	6460000	7360000	3840000	3840000	2990000	3260000	3470000	3530000
pmb2444	353.2	261.8	10	352.2	-	MAG (18:3) isomer1	Lipids_Glycerolipids	25600000	23500000	22300000	22400000	23200000	11700000	24100000	21000000	70400000	35000000	76300000	53400000	54300000	52700000	59100000	59100000	63800000	84900000	45600000	78700000	73700000	122000000	66300000	61500000	70600000	62100000
pmb2497	197	135.1	0.7	198	C05584	4-Hydroxy-3-methoxymandelate	Organic acids	47800	43000	32600	42600	40400	46500	34500	29900	32100	37400	30300	29200	34300	34400	39800	43300	33700	58600	50500	45000	35500	34700	41300	31100	33100	39900
pmb2507	213.1	78.9	0.97	214.1	C00672	2-Deoxyribose 1-phosphate	Carbohydrates	503000	607000	560000	606000	684000	491000	572000	507000	697000	783000	632000	616000	541000	635000	415000	499000	448000	565000	561000	518000	788000	763000	796000	630000	672000	627000
pmb2554	529.1	355.9	2.23	530.1	-	5-O-Feruloyl quinic acid glucoside	Quinate and its derivatives	155000	157000	162000	155000	164000	165000	175000	174000	61200	54900	54100	80200	70400	66700	611000	534000	482000	56100	54600	60100	49300	52400	48500	359000	359000	361000
pmb2561	190.1	84	2.43	191.1	C02712	N-Acetylmethionine	Amino acid derivatives	120000	115000	129000	114000	106000	118000	109000	119000	139000	166000	148000	167000	169000	194000	158000	164000	145000	193000	239000	257000	123000	122000	136000	90500	74400	87500
pmb2591	245	203.2	3.83	246	C03137	Acetyl tryptophan	Amino acid derivatives	2170000	1990000	2030000	2180000	2070000	2100000	2030000	2230000	3110000	3120000	2840000	2990000	3020000	2990000	3060000	2970000	3130000	4930000	4170000	4300000	2170000	2200000	2220000	2320000	2400000	2200000
pmb2601	307.1	161.2	4.33	308.1	-	7-hydroxycoumarin-beta-rhamnoside	Coumarins	378000	323000	321000	359000	379000	347000	386000	471000	972000	771000	677000	674000	712000	735000	360000	387000	419000	172000	188000	191000	730000	690000	702000	300000	353000	286000
pmb2620	207.1	192.1	5.49	208.1	-	"3,4-Dimethoxycinnamic acid"	Hydroxycinnamoyl derivatives	3920000	4000000	4270000	4220000	4620000	4210000	4360000	4430000	9010000	8170000	8310000	4000000	4000000	4040000	10100000	10100000	10100000	8110000	8140000	8130000	4960000	4830000	5030000	3980000	3850000	3810000
pmb2636	335.1	253.3	6.89	336.1	-	"8,15-DiHETE"	Lipids_Fatty acids	60300	69100	69100	67600	69100	71200	63700	55100	30700	41100	38200	56300	52800	66500	68000	70700	60300	96600	83500	80100	41900	31000	27200	34200	32700	45100
pmb2640	199	181.3	9.62	200	C02679	Lauric acid (C12:0)	Lipids_Fatty acids	43400	41300	43300	44500	41900	38700	39800	37900	38300	45300	50700	49200	48800	53800	64200	67400	65600	44400	39500	41600	34200	34500	35800	92700	92100	94800
pmb2648	263.1	147.2	0.71	264.1	C00378	Thiamine	Vitamins	3500	6080	6990	4360	5330	8260	8900	3460	4090	4340	5200	2870	0	2380	6210	8620	4180	7790	7250	8520	3880	9110	4870	7040	5650	4190
pmb2653	649.1	503.3	0.74	650.1	-	D(+)-Melezitose O-rhamnoside	Carbohydrates	92400	97100	97200	102000	110000	100000	91300	108000	51200	65900	58700	102000	125000	103000	94900	97600	86100	105000	116000	130000	176000	162000	172000	77500	89700	99300
pmb2654	460.1	118.2	0.74	461.1	-	Anthranilate O-hexosyl-O-hexoside	Benzoic acid derivatives	1000000	1050000	929000	983000	944000	999000	1020000	1050000	806000	842000	836000	797000	813000	840000	1090000	1180000	1180000	1050000	985000	1050000	983000	1010000	970000	728000	666000	733000
pmb2657	289.1	191.2	0.69	290.1	C03406	Argininosuccinate	Organic acids	571000	666000	689000	648000	657000	719000	759000	746000	776000	768000	760000	566000	626000	562000	421000	418000	404000	496000	458000	440000	625000	593000	599000	463000	414000	417000
pmb2684	328.1	134.2	1.84	329.1	C00575	Cyclic AMP	Nucleotide and its derivates	612000	675000	605000	833000	687000	732000	742000	731000	905000	901000	843000	823000	816000	866000	556000	521000	552000	496000	533000	503000	367000	368000	388000	687000	707000	651000
pmb2723	485.1	323.3	3.33	486.1	-	4-hydroxycoumarin di-glucoside	Coumarins	191000	195000	185000	185000	178000	187000	169000	194000	165000	179000	149000	131000	117000	156000	323000	267000	264000	197000	212000	215000	568000	532000	594000	190000	181000	216000
pmb2778	295	183.3	8.92	296	-	"9,10-EODE"	Lipids_Fatty acids	27700000	27000000	25200000	27000000	25600000	22400000	23100000	20700000	56500000	54400000	63200000	32300000	31400000	31700000	77400000	77500000	80100000	85400000	83900000	86700000	26800000	25900000	23300000	36800000	41800000	42300000
pmb2786	293	275.4	8.37	294	-	9-HOTrE	Lipids_Fatty acids	867000	875000	793000	703000	885000	861000	815000	701000	1930000	2090000	2190000	807000	807000	848000	2030000	2020000	2210000	2380000	2370000	2270000	698000	675000	663000	887000	938000	983000
pmb2787	293.2	249.9	9.12	294.2	-	9-KODE	Lipids_Fatty acids	198000	212000	194000	191000	202000	170000	163000	140000	314000	353000	346000	242000	262000	251000	411000	394000	491000	457000	445000	443000	206000	187000	175000	305000	333000	323000
pmb2791	309.1	291.4	7.5	310.1	-	9-HpOTrE	Lipids_Fatty acids	245000	279000	220000	259000	283000	236000	238000	235000	242000	260000	279000	117000	134000	110000	384000	386000	333000	385000	416000	453000	187000	224000	189000	155000	186000	166000
pmb2792	293	193.2	7.77	294	-	13-HOTrE(r)	Lipids_Fatty acids	132000	129000	125000	131000	145000	159000	146000	140000	124000	162000	214000	103000	129000	228000	209000	114000	117000	109000	95600	155000	105000	118000	162000	154000	133000	221000
pmb2795	177	145.2	5.43	178	-	4-Methoxycinnamic acid	Hydroxycinnamoyl derivatives	2810000	2830000	2930000	2960000	3070000	3000000	2990000	3040000	5020000	4790000	4820000	2360000	2390000	2360000	5510000	5460000	5380000	4740000	4640000	4760000	3320000	3300000	3400000	3100000	2940000	2990000
pmb2799	295	277.5	9.7	296	-	"12,13-EODE"	Lipids_Fatty acids	348000	327000	306000	315000	313000	305000	295000	215000	611000	726000	739000	526000	523000	488000	952000	964000	960000	924000	888000	914000	310000	319000	295000	819000	826000	807000
pmb2804	311.1	293.4	7.82	312.1	C04717	13-HPODE	Lipids_Fatty acids	2550000	2530000	2460000	2540000	3160000	2480000	2370000	2280000	4500000	5230000	5020000	2230000	2740000	2870000	6090000	5910000	4680000	5910000	6250000	6210000	2080000	2330000	2600000	3520000	3620000	3560000
pmb2819	665.1	323.4	2.23	666.1	-	O-Caffeoyl maltotriose	Hydroxycinnamoyl derivatives	62800	57900	62700	63200	58000	51800	52100	45800	73200	65200	74200	105000	108000	91700	93600	102000	94800	41200	49100	52200	120000	113000	118000	42800	51100	50900
pmb2826	147	85	0.92	148	C00815	Citramalate	Organic acids	1910000	1880000	1730000	2440000	1730000	1800000	1710000	2010000	1650000	1760000	1890000	1850000	2010000	2210000	2150000	2450000	2140000	2750000	2170000	2620000	2530000	2720000	2840000	3090000	2260000	2400000
pmb2831	315.1	153.2	2.53	316.1	-	Protocatechuic acid O-glucoside	Catechin derivatives	6360000	6360000	6420000	6200000	6460000	5810000	6150000	5670000	5340000	5440000	5030000	9980000	10300000	10500000	6590000	6490000	6500000	21300000	20600000	20900000	2350000	2600000	2700000	5250000	4940000	5050000
pmb2833	529	329.3	2.23	530	-	3-O-Feruloyl quinic acid glucoside	Quinate and its derivatives	115000	126000	135000	136000	135000	131000	130000	142000	47500	43500	48800	70000	61500	65000	486000	485000	468000	44800	41600	45400	42900	48100	42700	289000	273000	268000
pmb2867	350.1	144.2	1.78	351.1	-	Kynurenic acid O-hexside	Organic acids	2690000	2800000	2670000	2770000	2780000	2710000	3000000	2800000	8910000	8490000	8400000	1910000	1790000	1800000	4790000	4750000	4670000	5600000	5830000	5800000	3790000	3550000	3720000	2890000	2900000	2820000
pmb2871	315.1	152.1	1.9	316.1	-	"2,5-dihydroxy benzoic acid O-hexside"	Benzoic acid derivatives	11300000	12300000	12400000	13300000	12600000	10900000	12500000	12500000	15100000	14200000	14100000	10500000	9460000	9580000	18600000	21400000	18400000	20400000	19900000	21400000	16500000	16100000	17000000	10200000	10800000	10400000
pmb2873	214.1	134.2	3.69	215.1	-	3-(2-Naphthyl)-D-alanine	Amino acid derivatives	343000	354000	358000	369000	330000	335000	322000	264000	203000	234000	248000	170000	187000	207000	524000	588000	585000	233000	224000	250000	160000	145000	189000	162000	148000	194000
pmb2928	331	313.7	2.09	332	-	Gallic acid O-Hexoside	Benzoic acid derivatives	2670000	2770000	2580000	2560000	2520000	2770000	2910000	2780000	1750000	1740000	1710000	1530000	1520000	1430000	1190000	1140000	1090000	7560000	7460000	7810000	1660000	1710000	1620000	950000	933000	934000
pmb2933	311.1	149.2	2.19	312.1	-	Caftaric acid	Hydroxycinnamoyl derivatives	161000	152000	170000	140000	163000	134000	157000	134000	183000	161000	182000	103000	103000	98500	371000	291000	286000	201000	198000	250000	210000	207000	202000	137000	135000	134000
pmb2938	353.1	191.2	2.91	354.1	-	4-O-Caffeoyl quinic acid (criptochlorogenic acid)	Quinate and its derivatives	423000	491000	568000	485000	494000	476000	481000	451000	429000	362000	365000	482000	500000	537000	448000	479000	473000	400000	415000	414000	371000	441000	480000	431000	505000	467000
pmb2940	385.1	223.2	3.15	386.1	-	1-O-beta-D-Glucopyranosyl sinapate	Hydroxycinnamoyl derivatives	3710000	3860000	3790000	3990000	3890000	3980000	4000000	4010000	4890000	4710000	4800000	5540000	5770000	5730000	4030000	3830000	3770000	6090000	5920000	6250000	5880000	5700000	5950000	3650000	3400000	3580000
pmb2947	865.1	407.2	3.51	866.1	-	Catechin-catechin-catechin	Catechin derivatives	949000	1000000	1010000	912000	919000	974000	944000	897000	447000	338000	225000	985000	598000	379000	431000	832000	810000	563000	789000	423000	838000	757000	438000	1980000	1430000	1110000
pmb2954	771.1	609.5	2.53	772.1	-	Luteolin O-hexosyl-O-hexosyl-O-hexoside	Flavone	78500	69500	88200	86200	89200	79700	76400	85200	216000	200000	227000	41100	42300	47200	136000	135000	147000	59000	60700	56900	52600	55100	57000	26300	22500	25300
pmb2957	465.1	285.3	2.5	466.1	-	Cyanidin O-syringic acid	Anthocyanins	63400000	67300000	65000000	64100000	64900000	64300000	66100000	63800000	113000000	117000000	116000000	100000000	101000000	98000000	73500000	77800000	71700000	67000000	66800000	65000000	73700000	71300000	73700000	83500000	81200000	81400000
pmb2961	547.1	503.4	2.87	548.1	-	Peonidin O-malonylhexoside	Anthocyanins	2550000	2630000	2410000	2390000	2460000	2550000	2500000	2310000	1330000	1450000	1500000	1100000	1140000	1080000	2060000	2080000	1870000	936000	898000	966000	2230000	2260000	2350000	2960000	2920000	2830000
pmb2979	549.2	387.3	3.99	550.2	-	Hesperetin O-malonylhexoside	Flavanone	86700	123000	86600	101000	96800	128000	126000	130000	104000	115000	108000	109000	126000	111000	60400	20700	82900	95600	90200	68100	111000	114000	125000	58800	76600	76500
pmb2987	487.1	283.2	2.57	488.1	-	Acacetin O-acetyl hexoside	Flavone	3470000	3790000	3710000	3490000	3650000	3720000	3620000	3660000	1430000	1550000	1670000	3320000	3290000	3220000	5880000	5850000	5780000	8790000	8530000	8790000	1270000	1300000	1280000	4060000	3950000	3900000
pmb2991	739.1	269.3	3.72	740.1	-	Apigenin O-hexosyl-O-rutinoside	Flavone	35000	28500	34200	33400	34900	32700	36900	33700	0	0	0	0	0	0	0	0	0	23200	0	21800	0	0	0	0	0	0
pmb2999	461.1	285.2	3.8	462.1	-	Chrysoeriol 5-O-hexoside	Flavone	22900000	24400000	22400000	22700000	24600000	19900000	20500000	18000000	15700000	18300000	20300000	23600000	24500000	23600000	24900000	24800000	26900000	25500000	26000000	28300000	16500000	16800000	16100000	22200000	24100000	23600000
pmb3002	607.1	299.1	3.99	608.1	-	Chrysoeriol 7-O-rutinoside	Flavone	2920000	3240000	2890000	3130000	2740000	2890000	3200000	2810000	2660000	3130000	3340000	4220000	4040000	4950000	3730000	3660000	4140000	4140000	3970000	3770000	3360000	3310000	3320000	2830000	3020000	3060000
pmb3023	449.1	329.3	3.3	450.1	-	Eriodictyol C-hexoside	Flavone C-glycosides	23000000	23100000	22000000	23000000	24100000	23700000	23400000	24000000	51000000	51400000	48900000	31700000	31800000	30300000	46800000	40900000	40400000	34800000	34500000	34300000	23400000	25200000	25600000	33400000	33900000	34800000
pmb3026	505.1	301.2	3.91	506.1	-	Quercetin O-acetylhexoside	Flavonol	815000	918000	906000	773000	731000	913000	826000	719000	210000	263000	267000	263000	243000	230000	354000	389000	373000	231000	229000	297000	285000	257000	319000	257000	224000	251000
pmb3041	521.1	329.3	3.74	522.1	-	Tricin O-saccharic acid	Flavone	5840000	6130000	5810000	6000000	5920000	5790000	5870000	5200000	4250000	4200000	4300000	4470000	4700000	4520000	3000000	2900000	3060000	3480000	3280000	3290000	5900000	5800000	5780000	3750000	3880000	3970000
pmb3047	657.1	495.3	4.51	658.1	-	Tricin 4'-O-(syringyl alcohol) ether 5-O-hexoside	Flavonolignan	36400	37300	36200	35600	25900	32100	33700	35100	61000	46000	42900	33200	29100	21400	40500	48900	42900	36900	32800	36000	25300	28300	23300	37600	42200	38300
pmb3053	523.1	329.3	5.95	524.1	-	Tricin O-eudesmic acid	Flavone	2800	2830	2550	3840	3270	2030	3870	2490	2900	2420	5120	4840	5040	4450	4360	4880	3450	3390	3310	5200	2240	3060	3680	3780	2930	3660
pmb3055	513.1	191.2	1.82	514.1	-	p-Coumaroyl quinic acid O-glucuronic acid	Quinate and its derivatives	472000	604000	473000	562000	553000	573000	532000	594000	213000	237000	260000	341000	300000	298000	1050000	942000	864000	750000	735000	698000	546000	578000	586000	424000	417000	432000
pmb3059	543.1	191.2	1.99	544.1	-	Quinic acid O-di-glucuronic acid	Quinate and its derivatives	398000	443000	482000	443000	480000	480000	430000	393000	218000	216000	207000	153000	131000	147000	588000	573000	587000	1230000	1170000	1210000	553000	522000	658000	451000	431000	450000
pmb3061	499.1	163.2	2.18	500.1	-	5-O-p-coumaroyl quinic acid O-hexoside	Quinate and its derivatives	112000	165000	119000	116000	134000	108000	112000	109000	38500	54300	48800	0	0	0	187000	177000	162000	48500	56700	44400	0	36800	34700	135000	141000	139000
pmb3062	385.1	152.2	2.19	386.1	-	Eudesmoyl quinic acid	Quinate and its derivatives	622000	623000	659000	772000	854000	651000	685000	662000	404000	351000	398000	308000	286000	288000	917000	1050000	948000	1460000	1400000	1340000	942000	811000	919000	763000	798000	704000
pmb3072	481.1	319.3	3.13	482.1	-	3-O-p-coumaroyl shikimic acid O-hexoside	Quinate and its derivatives	65800	58800	52600	47600	68900	67200	66300	72200	144000	149000	158000	44100	57800	44700	112000	85400	104000	119000	112000	106000	93000	85900	75500	56900	49900	74800
pmb3073	709.1	401.3	3.43	710.1	-	O-p-Coumaroyl quinic acid O-rutinoside derivative	Quinate and its derivatives	386000	337000	358000	409000	335000	374000	343000	336000	84300	87000	93300	101000	128000	105000	108000	103000	87100	92100	111000	93100	188000	222000	169000	157000	164000	179000
pmb3074	337.1	190.9	3.46	338.1	-	3-O-p-Coumaroyl quinic acid	Quinate and its derivatives	30800000	30100000	31200000	31900000	32800000	31200000	29800000	24900000	13800000	14100000	14300000	25800000	28200000	25900000	23100000	23400000	22300000	24600000	23300000	23200000	32800000	32500000	32800000	22300000	22400000	22400000
pmb3075	319	145.3	3.97	320	-	3-O-p-Coumaroyl shikimic acid	Quinate and its derivatives	133000	155000	148000	169000	136000	171000	166000	191000	170000	160000	164000	99200	121000	96200	114000	120000	118000	162000	171000	173000	201000	217000	227000	183000	189000	195000
pmb3081	289.1	97	1.09	290.1	-	Glucarate O-Phosphoric acid	Carbohydrates	2030000	2350000	1960000	2000000	1980000	1710000	1790000	1690000	1320000	1140000	1130000	2040000	2240000	2110000	1640000	1550000	1350000	2120000	1910000	1970000	2000000	1890000	2200000	1640000	1730000	1680000
pmb3088	421.1	241.2	0.69	422.1	C00689	Trehalose 6-phosphate	Carbohydrates	209000	240000	239000	246000	288000	274000	273000	255000	276000	230000	273000	295000	253000	262000	190000	197000	216000	286000	282000	247000	273000	243000	302000	217000	227000	233000
pmb3093	351.1	132.6	2.44	352.1	-	"6,7-dihydroxycoumarin 7-O-quinic acid"	Coumarins	5100000	5120000	5540000	5390000	5170000	4540000	4710000	3290000	103000	159000	134000	211000	183000	267000	9800000	10400000	10900000	142000	138000	133000	172000	192000	223000	12300000	14000000	12800000
pmb3094	703.4	351.3	2.48	704.4	-	Esculetin O-quinacyl esculetin O-quinic acid	Coumarins	479000	514000	479000	487000	566000	423000	447000	200000	0	0	0	0	0	0	1480000	1440000	1670000	0	0	0	0	0	0	2810000	3510000	3070000
pmb3099	153	78.9	1.61	154	C06608	Diethyl phosphate	Organic acids	1210000	1370000	1140000	1290000	1250000	1200000	1340000	1200000	698000	1570000	3250000	174000	503000	3110000	1600000	367000	341000	872000	540000	2570000	531000	549000	1680000	727000	653000	1380000
pmb3101	175.1	131.3	2.74	176.1	C02504	2-Isopropylmalate	Organic acids	20900000	22200000	22500000	22800000	22800000	23200000	23500000	23200000	27300000	26500000	26500000	20700000	20900000	19700000	22300000	23100000	21100000	20000000	20100000	19600000	23500000	24000000	23900000	23100000	22000000	22400000
pmb3107	359.1	197.1	2.34	360.1	-	Syringic acid O-glucoside	Benzoic acid derivatives	1030000	1120000	1120000	1090000	1120000	1040000	1050000	993000	1190000	1210000	1180000	1090000	1120000	1110000	902000	863000	846000	783000	758000	783000	1410000	1370000	1430000	1070000	1080000	1050000
pmb3110	167	152.1	3.29	168	C06672	Vanillic acid	Hydroxycinnamoyl derivatives	520000	527000	480000	520000	513000	483000	492000	459000	476000	471000	455000	335000	366000	389000	447000	435000	457000	613000	508000	539000	386000	395000	330000	298000	324000	315000
pmb3114	561.1	271.3	3.45	562.1	-	Epicatechin-epiafzelechin	Catechin derivatives	846000	1010000	826000	972000	977000	1130000	1020000	1010000	1770000	1650000	1370000	1230000	1210000	1060000	1180000	1120000	1230000	1860000	1970000	1750000	1240000	1300000	1260000	1460000	1890000	1870000
pmb3117	452	255.3	8.69	453	-	LysoPE 16:0	Lipids_Glycerophospholipids	61800000	59600000	56200000	56000000	55900000	52900000	50000000	45800000	29700000	33400000	33100000	50100000	49800000	50800000	48900000	49200000	44200000	60700000	60000000	61300000	33100000	33100000	30500000	55400000	57700000	57000000
pmb3132	478.1	281.3	8.81	479.1	-	LysoPE 18:1 (2n isomer)	Lipids_Glycerophospholipids	5330000	5410000	4920000	4860000	5250000	5010000	4840000	4040000	2550000	2980000	2930000	4230000	4190000	4250000	2420000	2170000	2160000	8630000	8100000	8230000	6610000	6560000	6800000	4330000	4230000	4070000
pmb3264	611.1	306.2	1.14	612.1	C00127	Glutathione oxidized	Amino acid derivatives	670000	838000	784000	791000	910000	955000	887000	866000	905000	958000	805000	738000	731000	634000	1010000	1080000	924000	594000	571000	627000	609000	588000	670000	571000	543000	509000
pmb3894	329.1	314.3	5.86	330.1	-	Di-O-methylquercetin	Flavonol	5550000	5500000	5520000	5420000	5550000	5660000	5590000	5510000	10300000	10500000	10500000	9280000	9140000	9060000	11200000	10900000	10700000	11900000	11800000	12000000	8040000	8010000	7930000	5600000	5290000	5380000
pmb4344	362.1	211.1	1.15	363.1	C00144	Guanosine 5'-monophosphate	Nucleotide and its derivates	728000	824000	799000	774000	896000	820000	880000	753000	610000	624000	560000	820000	828000	832000	689000	656000	704000	656000	802000	814000	1710000	1850000	1910000	534000	508000	527000
pmb4777	337.1	143.2	4.36	338.1	-	4-Hydroxy-7-methoxycoumarin-beta-rhamnoside	Coumarins	902000	975000	980000	904000	858000	940000	909000	805000	955000	1100000	1100000	586000	549000	543000	640000	645000	579000	733000	779000	792000	712000	705000	697000	593000	551000	646000
pmb5304	277.1	233.7	10.56	278.1	C06427	α-Linolenic acid	Lipids_Fatty acids	59800	57900	62500	61700	56600	48700	48100	46700	59800	64800	72200	49700	47800	45400	65100	64900	65400	82600	81900	86100	84800	85300	80600	76800	76800	68500
pmc0066	333.1	137	0.67	332.1	C06196	2'-Deoxyinosine-5'-monophosphate	Nucleotide and its derivates	151000	116000	140000	122000	133000	110000	105000	80500	97400	90000	105000	56600	63500	69500	124000	140000	171000	210000	223000	221000	117000	146000	115000	180000	241000	188000
pmc0274	167.1	121	1.96	166.1	C16614	6-Methylmercaptopurine	Nucleotide and its derivates	8740000	10500000	10200000	9550000	10400000	10800000	10500000	10200000	12800000	13600000	13100000	10500000	9930000	9240000	12800000	12700000	12900000	14000000	13500000	13300000	8880000	9200000	8730000	12300000	12500000	11900000
pmc0281	400.2	136.1	2.05	399.2	-	Adenosine O-ribose	Nucleotide and its derivates	2300000	2620000	2370000	2330000	2420000	2490000	2460000	2410000	1890000	1810000	1830000	2480000	2440000	2210000	2450000	2520000	2370000	2370000	2230000	2240000	1850000	1920000	1840000	1900000	1740000	1760000
pmc0304	384.1	252.2	2.19	383.1	-	Succinyladenosine	Nucleotide and its derivates	31400000	33200000	30000000	31000000	32100000	34300000	32700000	32200000	21300000	21600000	23300000	25500000	24300000	22300000	14600000	14000000	13700000	39900000	43600000	39600000	14700000	13600000	14200000	16300000	14900000	15100000
pmc0682	133.1	105	4.16	132.1	-	4-Aminoindole	Indole derivatives	604000	626000	671000	641000	739000	745000	621000	623000	514000	397000	485000	350000	362000	262000	297000	372000	365000	79700	221000	241000	578000	535000	535000	148000	169000	132000
pmc0960	544.4	544.4	8.89	543.4	-	LysoPC 20:4	Lipids_Glycerophospholipids	10500000	10400000	9160000	9450000	9470000	7380000	8550000	6500000	6110000	6650000	8440000	12000000	11500000	14200000	5490000	5890000	6020000	15500000	15600000	16400000	35300000	34400000	33000000	14500000	15300000	15200000
pmc1990	299.1	74.8	6.74	300.1	-	"4'-Hydroxy-5,7-dimethoxyflavanone"	Flavanone	534000	539000	518000	563000	571000	584000	601000	592000	274000	240000	314000	241000	283000	300000	282000	275000	247000	244000	260000	270000	288000	474000	400000	291000	322000	289000
pmd0130	468.3	450.5	7.5	467.3	-	LysoPC 14:0 (2n isomer)	Lipids_Glycerophospholipids	1640000	1670000	1610000	1570000	1600000	1550000	1610000	1590000	1170000	1160000	1210000	831000	808000	778000	444000	463000	450000	2440000	2350000	2450000	9150000	8960000	9000000	836000	797000	825000
pmd0132	496.3	478.3	8.57	495.3	-	LysoPC 16:0 (2n isomer)	Lipids_Glycerophospholipids	31900000	31900000	30100000	30200000	30600000	30700000	32400000	31300000	21700000	21300000	21500000	17200000	17500000	17400000	17600000	17600000	17300000	52000000	50900000	51100000	89000000	85700000	84600000	21200000	20600000	21000000
pmd0136	524.4	507.4	9.69	523.4	-	LysoPC 18:0	Lipids_Glycerophospholipids	6890000	6850000	6580000	6670000	6320000	6600000	6910000	6850000	4490000	4740000	4670000	4080000	3960000	3980000	5590000	5530000	4990000	13000000	12300000	13800000	19400000	20000000	18800000	3300000	3480000	3590000
pmd0144	550.4	245.1	9.81	549.4	-	LysoPC 20:1 (2n isomer)	Lipids_Glycerophospholipids	221000	220000	231000	215000	261000	256000	276000	229000	476000	471000	487000	240000	258000	261000	255000	243000	261000	464000	434000	483000	1490000	1370000	1230000	295000	279000	233000
pmd0145	550.4	245.1	9.9	549.4	-	LysoPC 20:1	Lipids_Glycerophospholipids	1570000	1730000	1750000	1630000	1620000	1680000	1650000	1710000	1030000	1030000	1130000	1230000	1220000	1130000	817000	831000	993000	1880000	1720000	1900000	2110000	2290000	2050000	1490000	1330000	1420000
pmd0158	424.2	285.8	7.37	425.2	-	LysoPE 14:0 (2n isomer)	Lipids_Glycerophospholipids	20300	22200	23500	23000	23000	24500	23400	22300	20200	21900	20900	18100	19000	18700	14200	14600	14000	34000	35200	37300	52400	54300	54600	16900	17700	15800
pmd0160	452.3	255.3	8.55	453.3	-	LysoPE 16:0 (2n isomer)	Lipids_Glycerophospholipids	38200000	36000000	35400000	35700000	35300000	32400000	30600000	29200000	17500000	18700000	18300000	28300000	28300000	28500000	26400000	25900000	23600000	33900000	33500000	35400000	20100000	20200000	18900000	30500000	31700000	31600000
pme0001	609.2	301.3	4.03	610.19	C09806	Hesperetin 7-O-neohesperidoside (Neohesperidin)	Flavanone	5490000	5000000	5440000	5090000	5090000	4990000	4780000	5110000	6040000	5060000	5340000	7470000	6980000	6540000	5320000	6120000	6210000	5620000	6090000	6450000	4520000	4510000	3950000	5520000	5710000	5470000
pme0004	190.1	84	0.83	189.111	C02427	L-Homocitrulline	Amino acids	706000	622000	785000	741000	662000	687000	486000	628000	931000	927000	1020000	451000	609000	422000	845000	825000	1030000	775000	545000	696000	676000	698000	600000	406000	456000	545000
pme0005	121	121	1.42	120.044	C15587	Purine	Nucleotide and its derivates	3350000	3460000	2950000	3270000	3400000	3570000	3580000	3550000	1540000	1540000	1460000	2540000	2540000	2420000	4070000	4050000	4010000	1970000	1990000	2010000	3210000	2980000	3290000	2300000	2450000	2370000
pme0006	116.1	70	0.79	115.063	C00148	L-Proline	Amino acids	1170000	1410000	1370000	1450000	1570000	1260000	1470000	1370000	1320000	1450000	1380000	1070000	953000	901000	833000	800000	924000	1090000	1020000	1030000	745000	834000	742000	769000	827000	828000
pme0008	176.1	98.9	0.76	175.096	C00327	L-Citrulline	Amino acids	5300000	4970000	5070000	4560000	4810000	5270000	5070000	4730000	2110000	2330000	2270000	6530000	6520000	6030000	2170000	2190000	2320000	1190000	1150000	1300000	3900000	3890000	4180000	4450000	5450000	5070000
pme0009	104	73.9	0.72	105.043	C00065	L-Serine	Amino acids	1940000	1980000	2000000	2010000	2120000	2100000	2070000	2090000	1640000	1630000	1630000	1870000	1740000	1870000	2810000	3030000	3010000	2310000	2360000	2350000	2040000	2140000	2230000	1650000	1630000	1670000
pme0011	132	99.9	0.71	133.037	C00049	L-Aspartic acid	Amino acids	12500000	13300000	12600000	13000000	12400000	12900000	13100000	13000000	16100000	16100000	16100000	11800000	11700000	11100000	14800000	15500000	14600000	8770000	8440000	8830000	10800000	10700000	11000000	11100000	11100000	11200000
pme0013	146.1	102.1	0.72	147.053	C00025	L-Glutamic acid	Amino acids	20100000	21200000	20400000	20600000	19300000	20500000	20800000	20600000	12900000	12800000	12800000	15000000	15700000	15500000	14500000	15400000	14700000	15400000	15400000	15600000	16500000	16200000	16900000	17200000	16500000	16800000
pme0019	132.1	86	1.2	131.095	C00123	L-Leucine	Amino acids	19500000	21300000	21600000	20100000	21300000	22200000	22900000	21400000	19200000	22100000	20000000	25000000	23500000	22600000	23600000	24500000	27900000	28100000	26800000	27000000	22500000	22600000	20900000	18400000	18700000	18600000
pme0020	164.1	147.1	1.97	165.079	C00079	L-Phenylalanine	Amino acids	2830000	3160000	3160000	3220000	3060000	3100000	3180000	3170000	4260000	4310000	4200000	3220000	3200000	3280000	3850000	3950000	3860000	3970000	3850000	4090000	2610000	2560000	2620000	3970000	3950000	3890000
pme0022	118	100.9	0.74	119.058	C00188	L-Threonine	Amino acids	964000	1040000	1040000	1050000	1030000	1020000	994000	1010000	765000	820000	799000	927000	938000	980000	1070000	1090000	1030000	1050000	1030000	1050000	1040000	994000	1030000	735000	744000	767000
pme0026	147	83.2	0.68	146.106	C00047	L-(+)-Lysine	Amino acids	8350000	9320000	10600000	9520000	10100000	11500000	10900000	12200000	10000000	10400000	9730000	11000000	10300000	9640000	14000000	13100000	15600000	12200000	11500000	11600000	15200000	14700000	14000000	7290000	8370000	7220000
pme0031	127	110	1.56	126.043	C00178	Thymine	Nucleotide and its derivates	350000	346000	364000	365000	396000	419000	410000	387000	110000	112000	113000	203000	234000	214000	199000	141000	155000	234000	283000	251000	163000	182000	185000	100000	108000	108000
pme0033	137	110	1.13	136.038	C00262	Hypoxanthine	Nucleotide and its derivates	3220000	2770000	3100000	2830000	2930000	3180000	3120000	3070000	2230000	2720000	2570000	2360000	2170000	2310000	2160000	2260000	2520000	2310000	2260000	1980000	2020000	2000000	1780000	2260000	2350000	2160000
pme0036	154.1	92.9	0.7	155.07	C00135	L-Histidine	Amino acids	1170000	1260000	1320000	1340000	1280000	1160000	1200000	1140000	775000	799000	826000	1980000	1930000	1810000	1520000	1580000	1490000	2160000	2140000	2150000	1930000	2070000	2080000	1040000	1030000	1040000
pme0038	112	95	0.75	111.043	C00380	Cytosine	Nucleotide and its derivates	1230000	1080000	1070000	1130000	958000	1080000	1260000	1250000	942000	712000	678000	917000	747000	803000	727000	773000	810000	977000	530000	575000	525000	354000	374000	770000	894000	924000
pme0039	118.1	71.8	0.84	117.079	C00183	L-Valine	Amino acids	21200000	25000000	27800000	25800000	27000000	27300000	27300000	26900000	24300000	27500000	25400000	38500000	36800000	33800000	35300000	35900000	39400000	34400000	35900000	33300000	29600000	30000000	27800000	24400000	26100000	23600000
pme0042	173.1	131.1	0.71	174.112	C00062	L-(+)-Arginine	Amino acids	3670000	3770000	3790000	3820000	3570000	3520000	3340000	3230000	1380000	1280000	1280000	3840000	3900000	4160000	1160000	1170000	1080000	840000	792000	843000	3000000	3230000	3280000	4910000	4670000	4640000
pme0049	110	64.9	0.76	109.02	C00519	2-Aminoethanesulfinic acid	Organic acids	158000	221000	417000	281000	348000	276000	211000	221000	203000	247000	176000	167000	210000	180000	203000	185000	245000	199000	241000	187000	342000	319000	295000	301000	351000	245000
pme0050	203	116.1	2.47	204.09	C00078	L-Tryptophan	Amino acids	21700000	22500000	22200000	22300000	21900000	21400000	21700000	21100000	17700000	18300000	18000000	38400000	38600000	38400000	23800000	24400000	23700000	16600000	16900000	16400000	29800000	29300000	30200000	14500000	14100000	14400000
pme0056	145.1	101	2.63	146.058	-	"2,3-dimethylsuccinic acid"	Amino acid derivatives	2060000	2320000	2220000	2100000	2150000	2060000	2130000	2140000	1450000	1400000	1370000	1670000	1780000	1840000	1230000	1340000	1250000	1790000	1770000	1870000	2300000	2260000	2390000	1960000	1840000	1950000
pme0066	116.1	73.9	0.69	117.054	C00581	Guanidineacetic acid	Amino acid derivatives	6510	8480	6370	10300	4600	6370	10100	6680	7580	4130	6750	6360	8110	5820	4240	11200	14000	7790	4680	5390	7190	4580	6950	4400	3960	9740
pme0075	188.1	102	1.16	189.064	C00624	N-Acetyl-L-glutamic acid	Amino acid derivatives	969000	1100000	989000	1040000	1080000	1020000	1040000	1060000	491000	599000	494000	629000	577000	593000	315000	340000	377000	344000	319000	321000	743000	699000	901000	668000	744000	601000
pme0088	285	133.1	5.04	286	C01514	Luteolin	Flavone	121000	132000	123000	125000	128000	116000	132000	119000	47800	42600	12400	101000	83100	39600	12200	25400	31100	23400	24700	11700	98100	77000	30400	98100	76900	28300
pme0094	447.3	284.1	2.55	448.3	C08604	Cyanidin 3-O-glucoside (Kuromanin)	Anthocyanins	4600000	4730000	4790000	4430000	4690000	4810000	4650000	4460000	7470000	7110000	7440000	7100000	7490000	7350000	5510000	5100000	5390000	4500000	4490000	4570000	5320000	4530000	5360000	5650000	5160000	5460000
pme0120	118.2	101	0.8	117.079	C00431	5-Aminovaleric acid	Amino acid derivatives	537000	587000	741000	661000	771000	835000	820000	988000	738000	716000	758000	555000	461000	390000	568000	566000	556000	571000	625000	587000	649000	627000	511000	558000	662000	549000
pme0122	189.2	84	1.02	188.116	C02727	N6-Acetyl-L-lysine	Amino acid derivatives	6460000	5010000	5910000	6080000	6290000	6860000	6200000	5340000	8020000	8200000	7340000	4240000	5510000	4580000	8820000	8860000	9680000	6770000	7760000	6470000	6400000	6490000	6320000	4810000	6220000	4850000
pme0128	159.2	88	0.75	160.085	C00993	D-Alanyl-D-Alanine	Amino acid derivatives	27600	38800	36900	36300	36400	39200	23500	34000	71300	84400	80900	41100	46000	56200	47900	58500	50700	49500	45300	46600	28700	28400	28200	50100	42500	51200
pme0130	165.1	165.1	1.86	166.049	C16357	3-Methylxanthine	Nucleotide and its derivates	23000	22500	26500	24600	24700	22000	19900	22800	25000	31500	29200	38200	43000	30700	21500	22600	19400	22300	25700	20000	29700	29400	25800	18600	18800	15300
pme0133	281.3	120	2.49	280.106	-	Asp-phe	Amino acid derivatives	925000	837000	960000	933000	917000	984000	875000	862000	1080000	1160000	1220000	799000	769000	681000	1100000	1200000	1120000	807000	767000	858000	780000	857000	872000	768000	694000	771000
pme0138	189.2	130	1.21	188.08	-	Nα-Acetyl-L-glutamine	Amino acid derivatives	8460000	7880000	8650000	8950000	8770000	9040000	8870000	8820000	11300000	10600000	11500000	7820000	7910000	7340000	10200000	10700000	11300000	9420000	10500000	10300000	9180000	8880000	8950000	6290000	6790000	6700000
pme0161	118.1	101	0.74	119.058	C00263	L-Homoserine	Amino acids	18300	13700	16900	18100	21100	18300	21200	12200	16600	14700	15000	14400	8580	18400	20600	24800	19500	19100	13700	17300	22100	19100	18900	11600	12400	16100
pme0163	335.1	122.8	0.79	334.057	C00455	β-Nicotinamide mononucleotide	Nucleotide and its derivates	8270000	7610000	8440000	5690000	8370000	8540000	7680000	7900000	8730000	7140000	8460000	10200000	9800000	9340000	9880000	6350000	7560000	8140000	7870000	8240000	12900000	13200000	13100000	6510000	7140000	6700000
pme0165	165.1	165.1	2.02	166.049	C16358	1-Methylxanthine	Nucleotide and its derivates	128000	106000	127000	112000	130000	121000	118000	145000	98000	89300	79300	69400	69700	78200	117000	90900	94300	80900	85700	119000	105000	74700	82600	26800	40400	38400
pme0170	217.1	158.1	1.12	216.122	-	Nα-Acetyl-L-arginine	Amino acid derivatives	715000	536000	642000	680000	623000	669000	740000	554000	587000	778000	703000	567000	493000	601000	672000	668000	760000	506000	457000	365000	498000	514000	458000	501000	674000	595000
pme0174	132.1	72.8	1.29	131.058	-	N-Propionylglycine	Amino acid derivatives	6840000	7710000	8350000	7610000	8230000	8320000	8880000	8300000	7850000	8430000	8070000	9750000	9330000	8400000	9030000	9230000	10000000	10300000	10200000	10000000	9000000	9480000	7970000	7300000	7250000	7130000
pme0177	265.1	130.1	3.15	264.111	C04148	Phenylacetyl-L-glutamine	Amino acid derivatives	270000	288000	239000	243000	262000	309000	262000	295000	223000	239000	249000	245000	271000	272000	421000	465000	409000	587000	572000	544000	101000	84700	91800	153000	124000	155000
pme0180	168.1	151.1	0.68	169.085	C01152	1-Methylhistidine	Amino acid derivatives	20000	20500	22600	21800	20500	22800	23000	22800	14500	20100	21600	16800	19000	19100	15200	18000	17500	25600	36600	34400	24500	29900	31800	23200	23000	20000
pme0183	152.1	135.1	0.85	151.049	-	2-Hydroxy-6-aminopurine	Nucleotide and its derivates	1870000	2040000	1980000	1820000	1620000	992000	1000000	2060000	933000	1100000	1960000	1800000	2310000	2060000	2040000	1910000	2120000	2160000	1470000	1570000	568000	985000	1430000	1580000	878000	484000
pme0191	189.1	86	1.92	188.116	C02155	N-Glycyl-L-leucine	Amino acid derivatives	4450000	4620000	4430000	4200000	4640000	4910000	4650000	4990000	3690000	3670000	3630000	3700000	3270000	3720000	2890000	3120000	3080000	4320000	4510000	4490000	5880000	6290000	5260000	3400000	3640000	3250000
pme0196	285	214	5.68	286.048	C05903	Kaempferol	Flavonol	1710000	1670000	1630000	1570000	1640000	1670000	1600000	1570000	1010000	823000	270000	3060000	2590000	1220000	425000	1190000	1190000	2140000	2050000	974000	1030000	758000	312000	1060000	856000	396000
pme0199	301	151.1	5.08	302.043	C00389	Quercetin	Flavonol	21700000	22300000	21400000	21900000	21100000	22500000	22800000	21700000	12100000	10600000	5190000	17900000	13100000	7480000	6360000	12500000	12500000	17700000	17600000	8870000	11600000	9010000	4720000	14200000	11700000	6430000
pme0201	291.1	139.1	2.97	290.079	C06562	Catechin	Catechin derivatives	1770000	1860000	1790000	1710000	1840000	1940000	1920000	1770000	1800000	1900000	1680000	1580000	1580000	1440000	1640000	1660000	1540000	1920000	1910000	1960000	1620000	1730000	1630000	2590000	2650000	2590000
pme0202	611.2	303	3.56	610.153	C05625	Quercetin 3-O-rutinoside (Rutin)	Flavonol	28300000	28400000	26100000	25900000	28300000	29600000	30600000	27700000	21600000	21300000	20900000	25500000	25900000	24300000	24300000	23800000	22100000	27500000	26500000	26400000	26000000	26200000	26200000	22400000	22000000	22700000
pme0207	103	103	1.39	104.047	-	3-Hydroxybutyrate	Organic acids	1310000	958000	984000	852000	857000	801000	747000	773000	752000	841000	638000	905000	883000	967000	669000	623000	523000	1150000	1180000	1230000	694000	615000	700000	565000	622000	625000
pme0226	131.1	71.8	0.73	132.054	C00152	L-Asparagine	Amino acids	3890000	3660000	3360000	3500000	3180000	3500000	3250000	3500000	3160000	3430000	3390000	4540000	4550000	4250000	3490000	3500000	3530000	2150000	2360000	2210000	3690000	3760000	3750000	3080000	2980000	2970000
pme0230	268.1	136.1	1.88	267.097	C00212	Adenosine	Nucleotide and its derivates	1470000	1420000	1330000	1380000	1490000	1490000	1520000	1410000	1640000	1610000	1570000	1580000	1550000	1420000	1210000	1250000	1180000	1140000	1170000	1140000	790000	815000	780000	1290000	1250000	1340000
pme0231	247.1	130.1	4.03	246.1	-	N-(3-Indolylacetyl)-L-alanine	Amino acid derivatives	117000	133000	114000	129000	92700	122000	110000	134000	188000	173000	148000	123000	138000	109000	166000	197000	161000	280000	302000	325000	130000	143000	99400	66800	57700	49700
pme0233	188	144.1	2.71	189.043	C01717	Kynurenic acid	Organic acids	37600000	36900000	36900000	34900000	36000000	34000000	35000000	34700000	37500000	39200000	37700000	60700000	59800000	62400000	76100000	85200000	77900000	38700000	39100000	37500000	31100000	32800000	31600000	50400000	51400000	51700000
pme0237	183.1	137.1	4.63	182.058	-	"Ethyl 3,4-Dihydroxybenzoate (Ethyl protocatechuate)"	Organic acids	1110000	1200000	1050000	1140000	1220000	1040000	1200000	1180000	1110000	1070000	1060000	645000	530000	534000	761000	774000	719000	1170000	1170000	1080000	1680000	1840000	1810000	974000	1030000	1080000
pme0238	113	94.9	2.24	112.016	-	2–furanoic acid	Organic acids	523000	537000	665000	503000	527000	539000	568000	537000	0	0	0	327000	445000	234000	497000	427000	306000	0	0	0	385000	437000	507000	235000	0	0
pme0240	121	77	4.53	122.037	C00180	Benzoic acid	Benzoic acid derivatives	16700000	15800000	15500000	15900000	17900000	15400000	15800000	15600000	21800000	17000000	17000000	9930000	10700000	11100000	15700000	15700000	15900000	13000000	12400000	12500000	18000000	18400000	17900000	9620000	9520000	8590000
pme0243	131	86.9	1.9	132.042	C00489	Glutaric acid	Organic acids	4860000	5250000	5170000	5360000	4720000	4940000	5190000	5470000	2830000	2710000	2690000	1610000	1550000	1530000	3790000	4020000	3880000	5620000	5380000	5820000	6960000	6440000	6460000	3200000	3200000	2850000
pme0245	145.1	80.9	2.63	146.058	C06104	Adipic acid	Organic acids	1190000	1370000	1360000	1380000	1420000	1420000	1350000	1470000	877000	932000	877000	653000	679000	645000	879000	919000	658000	1030000	1290000	1270000	1050000	1320000	1270000	1230000	1100000	1220000
pme0247	130.1	128	0.74	131.058	C01157	trans-4-Hydroxy-L-proline	Amino acid derivatives	30200	31300	28800	38000	46000	33000	37800	40700	38800	28500	36700	25200	29300	26600	22700	25000	20100	28200	36600	32800	47400	33600	38600	95100	89900	91000
pme0250	187.1	125.1	4.43	188.105	C08261	Azelaic Acid	Organic acids	7410000	7170000	7100000	7110000	7420000	7190000	7060000	6960000	11200000	10900000	10800000	5590000	5770000	5870000	8320000	7950000	8080000	5800000	5580000	5650000	5910000	6560000	5880000	5120000	4850000	4770000
pme0252	172.1	130	3.41	173.105	C02710	N-Acetyl-l-leucine	Amino acid derivatives	2770000	2580000	2500000	2560000	2460000	2430000	2400000	2220000	2840000	2450000	2570000	2280000	2370000	2480000	1920000	2130000	2300000	4410000	4420000	4650000	1290000	1290000	1160000	1470000	1420000	1520000
pme0256	151	108	1.17	152.033	C00385	Xanthine	Nucleotide and its derivates	745000	808000	815000	756000	917000	833000	840000	806000	988000	916000	859000	1450000	1310000	1360000	1120000	1080000	1180000	826000	888000	833000	1220000	1090000	1190000	704000	682000	716000
pme0258	113	95.9	1.19	112.027	C00106	Uracil	Nucleotide and its derivates	14400000	12200000	10000000	11300000	11400000	14300000	14200000	11900000	12900000	15300000	13500000	9520000	9010000	9550000	10000000	10300000	10000000	8210000	9560000	9130000	7580000	7670000	7550000	13000000	13800000	13200000
pme0263	259.1	126.7	1.78	258.085	-	5-Methyluridine	Nucleotide and its derivates	520000	527000	588000	481000	511000	559000	527000	524000	615000	630000	622000	690000	701000	655000	510000	497000	512000	844000	814000	782000	513000	567000	525000	785000	746000	723000
pme0264	243.1	127.1	2.08	242.09	C00214	Thymidine	Nucleotide and its derivates	2790000	3090000	2640000	2940000	3010000	3180000	3080000	2790000	1780000	1710000	1650000	1330000	1530000	1250000	2060000	1880000	2090000	1970000	1910000	1820000	2490000	2580000	2490000	4100000	3950000	3630000
pme0265	203.1	93	4.84	202.12	C08277	Sebacate	Organic acids	162000	134000	129000	134000	161000	142000	178000	164000	102000	125000	101000	108000	156000	124000	79600	72700	94700	78400	94600	73800	107000	139000	109000	97200	97700	115000
pme0267	131	86.9	2.08	132.042	-	2-Methylsuccinic acid	Organic acids	2850000	2750000	2800000	2710000	2650000	2650000	2670000	2570000	3060000	3030000	3020000	2350000	2260000	2390000	1450000	1480000	1440000	1460000	1510000	1480000	5360000	5060000	5000000	2850000	2880000	2770000
pme0272	149	76.9	2.57	150.032	C02137	Benzoylformic acid	Organic acids	5540000	6000000	5860000	5720000	5880000	5840000	6460000	5950000	9330000	9590000	8980000	3350000	3440000	3430000	10600000	12400000	10200000	11200000	11400000	11200000	3780000	3810000	3770000	5700000	5610000	5350000
pme0274	132.1	76.9	1	131.095	C02378	6-Aminocaproic acid	Organic acids	3260000	3550000	4400000	3850000	3580000	3940000	3310000	4190000	3650000	3430000	4000000	4780000	4710000	4190000	4690000	4180000	4620000	5990000	4700000	5640000	3680000	4120000	3870000	2850000	3200000	2850000
pme0275	115	97.9	1.97	116.047	-	4-Oxopentanoate	Organic acids	50500	49700	55400	58800	53800	46900	61000	44800	51600	44800	42400	50000	71200	73400	52600	55500	52500	50500	47900	54100	56000	52900	60100	44500	55400	59000
pme0278	191.1	127.7	0.73	190.095	C00666	"2,6-Diaminooimelic acid"	Amino acid derivatives	4400000	4390000	4770000	4580000	4680000	4590000	4770000	4520000	4400000	4900000	5000000	7760000	7730000	7650000	9200000	9580000	10900000	7790000	7860000	6930000	3750000	3850000	4020000	4870000	5420000	4460000
pme0281	165	121.1	3	166.027	C06337	Terephthalic acid	Organic acids	1150000	1260000	1240000	1280000	1280000	1170000	1240000	1180000	1000000	1200000	1540000	623000	823000	1670000	1860000	1300000	1200000	1090000	1070000	1520000	1130000	1200000	1820000	884000	802000	1320000
pme0282	165	76.9	2.98	166.027	C01606	Phthalic acid	Organic acids	75100	85400	81800	95000	72000	87700	79100	77200	59400	66300	77300	41900	53700	59300	97900	102000	95300	104000	99600	109000	85900	89900	99800	55300	52100	54700
pme0285	146.1	85.9	0.77	145.085	C01035	4-Guanidinobutyric acid	Organic acids	9030000	9450000	10300000	9560000	10100000	10300000	10900000	10800000	10200000	10900000	10900000	8360000	7740000	6980000	9250000	9310000	9310000	9540000	10500000	9960000	12500000	12200000	11400000	7920000	8430000	8040000
pme0286	131.1	85	3.48	132.079	-	2-Hydroxyisocaproic acid	Organic acids	136000	135000	131000	148000	134000	138000	143000	137000	127000	120000	136000	114000	142000	121000	111000	132000	133000	150000	158000	164000	92600	111000	98900	101000	90700	85600
pme0291	160.1	114.1	3.03	159.126	-	Dl-2-Aminooctanoic acid	Organic acids	8280000	9830000	9410000	9580000	9780000	10600000	10300000	10100000	7990000	7980000	8590000	16800000	16000000	16400000	2920000	2820000	2950000	8660000	8030000	9450000	10700000	11200000	10700000	9540000	8400000	9210000
pme0292	195.1	121	3.9	196.074	-	"(3,4-Dimethoxyphenyl) acetic acid"	Organic acids	17200	12600	15800	10100	27000	7250	10400	8890	18900	6670	14100	14800	5720	8400	6570	14400	16400	8340	9400	9530	37500	30200	24200	10800	24900	11900
pme0295	146.1	85.8	1.59	145.074	-	4-Acetamidobutyric acid	Organic acids	879000	1250000	1480000	1080000	1200000	1100000	1220000	1020000	967000	1160000	1200000	860000	481000	575000	1170000	1050000	1340000	760000	790000	790000	824000	706000	534000	1100000	1250000	1020000
pme0298	179.1	123	4.53	178.063	C02666	Coniferylaldehyde	Hydroxycinnamoyl derivatives	1170000	1210000	1150000	1260000	1350000	1250000	1340000	1320000	908000	918000	1020000	717000	682000	689000	836000	864000	761000	880000	838000	787000	1240000	1440000	1310000	944000	936000	1050000
pme0300	149.1	103	5.22	148.052	C00423	Cinnamic acid	Hydroxycinnamoyl derivatives	405000	486000	405000	507000	500000	534000	544000	507000	163000	159000	179000	192000	178000	215000	184000	167000	119000	261000	274000	250000	300000	265000	308000	231000	274000	283000
pme0303	179	135.1	3.16	180.042	C01197	Caffeic acid	Hydroxycinnamoyl derivatives	11900000	12500000	12400000	12500000	12800000	12400000	12700000	12600000	9640000	9210000	8930000	13700000	13100000	12700000	9010000	8980000	8560000	10800000	10500000	10700000	10700000	10700000	7690000	8900000	8470000	8610000
pme0305	193.1	134.1	4.03	194.058	C01494	Ferulic acid	Hydroxycinnamoyl derivatives	9440000	9660000	9670000	9940000	9440000	9470000	9200000	9260000	30000000	26000000	24100000	19900000	20500000	17400000	16600000	16500000	16400000	12300000	11900000	12600000	7270000	8120000	8260000	11100000	10700000	9590000
pme0307	227.1	143.1	4.74	228.079	C03582	Resveratrol	Hydroxycinnamoyl derivatives	1150000	595000	610000	626000	624000	1160000	599000	702000	422000	801000	525000	664000	721000	547000	403000	533000	566000	613000	686000	579000	472000	435000	383000	625000	522000	425000
pme0309	183	124.1	3.11	184.037	-	Methyl gallate	Benzoic acid derivatives	103000	97700	94800	114000	111000	120000	123000	129000	0	24300	21400	29900	36700	36600	61300	49900	41900	26000	0	24400	0	0	0	0	0	0
pme0321	431.1	285.1	4.72	432.106	-	Kaempferol 7-O-rhamnoside	Flavonol	18700000	18100000	17700000	17600000	14600000	17100000	15800000	15900000	12700000	10600000	11900000	17100000	16800000	14900000	13000000	13800000	13800000	16800000	17000000	15600000	15300000	15200000	13800000	17400000	16900000	16700000
pme0324	255.1	69.7	6.73	254.058	C10028	Chrysin	Flavone	353000	312000	308000	312000	315000	337000	291000	294000	70800	80400	55800	121000	96600	75600	68500	78500	81500	92600	104000	77900	103000	104000	85800	149000	128000	108000
pme0333	579.2	271.1	4.02	578.164	C12627	Apigenin 7-O-neohesperidoside (Rhoifolin)	Flavone	1570000	1680000	1480000	1680000	1660000	1650000	1600000	1520000	619000	768000	604000	538000	487000	300000	763000	961000	921000	1080000	1180000	867000	1240000	1100000	1170000	4660000	4500000	4160000
pme0361	435.1	303	3.96	434.085	-	Quercetin 3-alpha-L-arabinofuranoside (Avicularin)	Flavonol	7700000	6860000	7300000	7390000	6880000	8480000	7230000	6710000	10500000	10100000	9130000	8530000	7800000	7170000	8420000	7880000	8470000	9150000	9290000	8370000	7790000	6330000	7720000	8310000	7650000	7140000
pme0363	299.1	284	5.71	300.063	C04293	Chrysoeriol	Flavone	183000	181000	196000	163000	170000	184000	175000	169000	69200	63500	31400	185000	160000	118000	34800	50700	64900	42200	47400	21700	130000	130000	69800	95000	88800	56300
pme0370	595.2	287.1	3.83	594.159	-	Kaempferol 3-O-rutinoside (Nicotiflorin)	Flavonol	2030000	2110000	2000000	2100000	1930000	2090000	2110000	2020000	1500000	1520000	1480000	2320000	2240000	1950000	1670000	1650000	1800000	1900000	2000000	1980000	2150000	2180000	2170000	1780000	1820000	1750000
pme0371	433.1	122.9	4.21	434.121	C09099	Naringenin 7-O-glucoside (Prunin)	Flavanone	7300000	7720000	8100000	7340000	8020000	7990000	7680000	7600000	11300000	10900000	10500000	7680000	9030000	7360000	8100000	8220000	7950000	15100000	15500000	15100000	4960000	4760000	4800000	9140000	8650000	8580000
pme0376	271.1	151	5.54	272.068	C00509	Naringenin	Flavanone	25400000	25400000	25400000	25600000	25900000	25300000	25400000	24500000	5240000	5180000	4480000	12200000	11900000	10700000	1620000	1820000	1800000	1910000	1890000	1710000	14700000	14600000	13500000	4550000	4340000	4000000
pme0379	271.1	215.1	5.62	270.053	C01477	Apigenin	Flavone	278000	282000	265000	268000	257000	268000	261000	251000	160000	136000	54500	365000	285000	141000	52200	94300	89700	92600	103000	70300	191000	156000	81800	120000	109000	53500
pme0388	183.1	137.1	3.25	182.058	C05582	Homovanillic acid	Hydroxycinnamoyl derivatives	5340000	6190000	6020000	6780000	7130000	7450000	6820000	6550000	8100000	8550000	8700000	6170000	5480000	6740000	10200000	9640000	10500000	5840000	5690000	6130000	9000000	9220000	7760000	4480000	4920000	4530000
pme0397	173.1	92.9	0.94	174.053	C00493	Shikimic acid	Organic acids	1140000	1140000	1030000	1110000	1010000	977000	1010000	965000	1280000	1150000	1380000	857000	863000	856000	899000	983000	813000	1050000	1040000	979000	1130000	1070000	1150000	882000	1010000	961000
pme0399	355.1	355.1	2.8	354.095	C00852	Chlorogenic acid (3-O-Caffeoylquinic acid)	Quinate and its derivatives	3610000	3850000	3860000	3880000	3810000	3890000	3710000	3640000	2700000	2670000	2680000	4160000	3950000	4090000	3010000	3080000	3260000	3100000	3190000	3220000	3220000	3240000	3080000	3750000	3430000	3550000
pme0401	369.1	163	3.65	368.111	-	Chlorogenic acid methyl ester	Quinate and its derivatives	2290000	2550000	2550000	2600000	2570000	2460000	2610000	2780000	1770000	1750000	1580000	2140000	2090000	2190000	1480000	1500000	1690000	1270000	1220000	1350000	1220000	1290000	1150000	1350000	1480000	1370000
pme0408	197.1	122.9	3.38	198.053	C10833	Syringic acid	Hydroxycinnamoyl derivatives	105000	120000	115000	114000	104000	119000	92300	106000	154000	161000	163000	83600	78300	69100	145000	149000	141000	78700	70300	84300	104000	109000	124000	72500	82400	63900
pme0413	151	136.1	3.97	152.047	C00755	Vanillin	Benzoic acid derivatives	1090000	1050000	1140000	1140000	1140000	1130000	1210000	1190000	1580000	1380000	1330000	796000	854000	836000	1470000	1400000	1500000	1220000	1190000	1250000	1420000	1410000	1350000	945000	976000	904000
pme0418	165.1	92.9	3.84	166.063	C01744	3-(4-Hydroxyphenyl)propionic acid	Hydroxycinnamoyl derivatives	123000000	132000000	133000000	126000000	131000000	132000000	128000000	130000000	93500000	109000000	109000000	64100000	60700000	58300000	80700000	75700000	68500000	71000000	73300000	71100000	80900000	76900000	78800000	108000000	100000000	107000000
pme0422	193.1	134.1	4.03	194.058	-	3-Hydroxy-4-methoxycinnamic acid	Hydroxycinnamoyl derivatives	9720000	9280000	9500000	9680000	9070000	9200000	9550000	9190000	29700000	26200000	23300000	18200000	18700000	18500000	16800000	16900000	16400000	12200000	12000000	12700000	8070000	8930000	8300000	11500000	11400000	10200000
pme0426	123.1	122.9	4.02	124.052	C06730	4-Methylcatechol	Catechin derivatives	28600	29600	24200	30200	29200	28900	22800	24300	27100	23700	26200	15300	16800	16300	9260	9820	8260	14000	11800	17400	15500	15100	16100	15100	10900	14200
pme0428	237.1	103.1	5	238.084	-	"3,4,5-Trimethoxycinnamic acid"	Hydroxycinnamoyl derivatives	57700	57500	57300	55400	65500	48800	60800	60800	187000	166000	160000	105000	110000	113000	54300	53700	51600	4120	6530	7280	92000	89100	95300	70100	72700	60400
pme0431	577	287.9	3.67	576.127	-	Procyanidin A1	Proanthocyanidins	1360000	1410000	1230000	1280000	1260000	1380000	1420000	1160000	529000	440000	270000	732000	668000	375000	208000	265000	382000	1010000	1240000	640000	1160000	1100000	578000	352000	411000	128000
pme0432	575	285.3	3.64	576.127	C10237	Procyanidin A2	Proanthocyanidins	500000	541000	512000	470000	463000	505000	473000	447000	332000	275000	179000	539000	544000	307000	311000	377000	443000	477000	503000	344000	692000	697000	470000	996000	1080000	787000
pme0435	579.1	127.3	2.84	578.142	-	Procyanidin B2	Proanthocyanidins	2790000	3380000	3490000	3160000	3030000	2880000	3210000	3030000	2530000	2580000	1880000	2100000	2510000	1920000	1420000	1720000	1580000	3180000	2950000	2770000	2520000	3070000	2880000	4330000	3400000	4100000
pme0436	577.1	407.3	2.87	578.142	-	Procyanidin B3	Proanthocyanidins	21400000	23100000	24400000	20700000	20500000	24600000	25200000	22000000	21600000	20100000	18400000	18800000	18200000	17700000	11200000	12500000	12100000	22000000	20700000	20100000	23000000	20400000	20100000	26900000	27200000	28700000
pme0442	303	149.3	2.9	303.24	C05908	Delphinidin	Anthocyanins	1440000	1380000	1200000	1250000	1350000	1160000	1180000	1070000	1280000	1220000	1450000	372000	390000	439000	1640000	1830000	1650000	803000	777000	817000	522000	825000	812000	642000	582000	684000
pme0443	493	331.7	2.87	493	-	Malvidin 3-O-galactoside	Anthocyanins	356000	598000	540000	550000	674000	717000	652000	648000	804000	863000	1010000	424000	370000	363000	930000	1030000	953000	372000	460000	420000	568000	744000	633000	587000	458000	487000
pme0444	493.2	331.6	2.87	493.2	C12140	Malvidin 3-O-glucoside (Oenin)	Anthocyanins	3170000	3680000	3320000	3650000	4130000	4080000	4200000	3900000	5340000	5740000	6970000	2810000	2520000	2540000	5930000	5570000	5570000	2830000	3380000	3630000	3920000	4860000	4410000	3090000	2640000	3010000
pme0450	289	78.8	3.18	290.3	C09727	L-Epicatechin	Catechin derivatives	5380000	5050000	5120000	5330000	4920000	4940000	4740000	4930000	5210000	5130000	4860000	3920000	4020000	3910000	4100000	4050000	4310000	5020000	4830000	4820000	5510000	5540000	5650000	7230000	7250000	7490000
pme0486	117	100	1.32	118.027	C02170	Methylmalonic acid	Organic acids	34000000	25900000	31500000	31700000	29800000	29700000	29800000	29700000	21700000	21200000	19800000	26700000	31700000	28900000	31200000	31400000	28600000	42900000	47400000	43900000	49400000	48900000	49400000	33000000	33900000	32700000
pme0490	124	78	1.11	123	C00253	Nicotinic acid	Nicotinic acid derivatives	2850000	2800000	2540000	2660000	2830000	2870000	3140000	2720000	3460000	3750000	3640000	2820000	2710000	2530000	2920000	2910000	2840000	3030000	3230000	3070000	2240000	2100000	2250000	2840000	3030000	2900000
pme0499	181	70.9	0.74	182.079	C00794	D-Sorbitol	Alcohols and polyols	11200000	12000000	11900000	12000000	12500000	11800000	11700000	12100000	7750000	8040000	7690000	7510000	7710000	7840000	5740000	6020000	5880000	6750000	6750000	6860000	10600000	11000000	11200000	12300000	11200000	11500000
pme0500	503.4	323.2	0.79	504.169	-	D(+)-Melezitose	Carbohydrates	49400	43100	50600	50600	59100	44300	49500	43800	54000	62800	57100	55100	47400	44800	45100	70600	54700	55700	57700	66600	80500	69000	94000	47700	51400	56300
pme0513	151	70.8	0.77	152.069	C00379	Xylitol	Alcohols and polyols	61400	76200	65300	91600	70200	79500	65300	66800	92200	84300	105000	88800	69600	90900	48600	64900	73000	57500	73200	45100	49700	48500	61500	89000	94900	75900
pme0516	179.2	87	0.74	180.063	C00137	Inositol	Others	3270000	3520000	3420000	3660000	3410000	3520000	3610000	3400000	3060000	3200000	3220000	2850000	2760000	2760000	3090000	3480000	3080000	4400000	4620000	4210000	3320000	3020000	3210000	3500000	3510000	3550000
pme0519	341	58.8	0.78	342.116	-	D-(+)-Sucrose	Carbohydrates	10800000	12600000	13100000	11900000	13100000	13400000	13200000	12000000	12100000	12400000	12400000	10700000	11200000	9810000	12800000	14400000	13200000	12800000	13400000	13600000	13000000	13200000	11800000	14500000	14100000	12700000
pme0534	195.2	75.1	0.7	196.058	C00257	Gluconic acid	Carbohydrates	18300000	18800000	16700000	15600000	13900000	14300000	16400000	18100000	17600000	22900000	20500000	8900000	9760000	9150000	26900000	28100000	23600000	25000000	22800000	23300000	15800000	18200000	19500000	21900000	20600000	19000000
pme0543	160.1	116	4.32	161.048	-	Indole-5-carboxylic acid	Indole derivatives	269000	253000	273000	281000	287000	278000	281000	268000	352000	313000	295000	208000	206000	198000	514000	554000	587000	99700	92600	98300	822000	767000	760000	286000	275000	243000
pme1002	138.1	103	1.2	137.084	C00483	L-Tyramine	Amino acids	24800000	29900000	32000000	28400000	29300000	32400000	31300000	31000000	12700000	13200000	12600000	22700000	21000000	19200000	33300000	33200000	36000000	17900000	17200000	17300000	30500000	31100000	28100000	21600000	20700000	20200000
pme1014	445.3	281	10.71	444.303	C00828	Menaquinone (K2)	Vitamins	469000	533000	505000	590000	575000	474000	569000	681000	890000	704000	926000	734000	777000	749000	823000	802000	967000	544000	581000	621000	761000	540000	544000	1130000	1200000	1230000
pme1021	177.1	70.8	0.78	178.048	C00198	"D-(+)-Glucono-1,5-lactone"	Carbohydrates	1990000	2050000	2060000	2210000	2170000	2290000	1980000	2300000	2590000	2970000	2690000	1460000	1410000	1460000	2070000	1930000	1900000	2510000	2320000	2220000	2630000	2680000	2610000	1720000	1840000	1720000
pme1055	207.1	144.1	1.95	208.085	C00328	L-Kynurenine	Amino acid derivatives	541000	606000	610000	612000	533000	570000	588000	568000	346000	334000	323000	1560000	1610000	1690000	660000	689000	669000	399000	389000	426000	1140000	997000	1080000	426000	438000	400000
pme1063	243.1	110	1.19	244.07	C00299	Uridine	Nucleotide and its derivates	8970000	10000000	8890000	9510000	9460000	9650000	9780000	9150000	12200000	12200000	11300000	8170000	8230000	7900000	8600000	8300000	8130000	5810000	5890000	5570000	5260000	5030000	5100000	8070000	8060000	8050000
pme1070	180.1	163	1.14	181.074	C00082	L-(-)-Tyrosine	Amino acids	2220000	2430000	2100000	2280000	2240000	2240000	2310000	2310000	1890000	1810000	1770000	3020000	2820000	2910000	1960000	2070000	2070000	2290000	2270000	2260000	3120000	2950000	3120000	1730000	1770000	1640000
pme1086	306	143	1.14	307.084	C00051	Glutathione reduced form	Amino acid derivatives	2800000	2820000	2810000	2430000	2260000	2450000	2380000	2030000	5250000	5630000	6270000	7450000	8840000	7920000	2100000	1770000	1440000	3450000	3360000	3720000	4950000	4210000	6040000	10900000	11700000	10800000
pme1097	134.1	134.1	1.13	135.055	C00147	Adenine	Nucleotide and its derivates	1230000	1270000	1400000	1280000	1320000	1360000	1360000	1370000	1190000	1240000	1240000	737000	683000	796000	937000	1010000	1020000	837000	893000	849000	592000	586000	644000	916000	831000	935000
pme1104	130.1	130.1	1.23	131.095	C00407	L-Isoleucine	Amino acids	419000	434000	420000	350000	451000	475000	450000	409000	505000	490000	398000	430000	524000	517000	453000	385000	444000	480000	558000	595000	320000	386000	416000	285000	287000	332000
pme1109	152	135.1	1.15	151.049	C00242	Guanine	Nucleotide and its derivates	25500000	25000000	23600000	24500000	25100000	25800000	26000000	24400000	22900000	23800000	22300000	30300000	30200000	27200000	18600000	19100000	19300000	29900000	29300000	29800000	19100000	18000000	18000000	13500000	13800000	13500000
pme1119	269.1	137	0.8	268.081	C00294	Inosine	Nucleotide and its derivates	682000	630000	638000	627000	740000	648000	675000	657000	663000	696000	618000	618000	541000	554000	601000	657000	766000	1100000	1070000	1030000	704000	772000	754000	929000	1010000	923000
pme1162	169	122.8	1.75	170.022	C01424	Gallic acid	Benzoic acid derivatives	1700000	1670000	1630000	1780000	1630000	1560000	1530000	1740000	235000	226000	171000	335000	278000	173000	119000	83800	134000	102000	113000	132000	192000	279000	232000	215000	204000	185000
pme1175	282.1	150.1	1.47	283.092	C00387	Guanosine	Nucleotide and its derivates	24700000	26700000	25400000	24200000	24200000	26200000	26300000	23500000	20600000	18900000	20300000	18500000	20000000	18300000	15700000	15200000	16300000	14000000	14800000	14300000	12400000	11900000	11400000	19100000	18300000	19100000
pme1181	266.1	150.1	1.69	267.097	C00330	Deoxyguanosine	Nucleotide and its derivates	235000	253000	241000	247000	257000	245000	243000	238000	111000	109000	121000	164000	179000	172000	108000	120000	125000	155000	167000	164000	134000	134000	141000	166000	164000	156000
pme1194	228	112	1.13	227.091	C00881	Deoxycytidine	Nucleotide and its derivates	1170000	1320000	1430000	1340000	1340000	1500000	1510000	1360000	505000	527000	484000	623000	576000	586000	401000	336000	373000	385000	413000	405000	578000	593000	570000	1140000	1120000	1010000
pme1201	273.1	167.1	5.52	274.084	C00774	Phloretin	Flavanone	6150000	6070000	6140000	6070000	6120000	6330000	6170000	5830000	695000	670000	536000	1570000	1440000	1290000	614000	713000	722000	746000	752000	686000	1540000	1440000	1270000	1240000	1190000	1070000
pme1210	150	72.8	1.18	149.051	C00073	L-Methionine	Amino acids	9310000	9080000	9610000	8800000	9470000	9670000	9940000	10500000	10700000	11900000	11800000	15700000	12700000	14200000	21000000	20800000	23300000	13100000	13300000	13300000	13300000	13800000	13100000	6500000	7600000	6290000
pme1218	124	77.8	1.21	123.032	C10164	2-Picolinic acid	Organic acids	669000	617000	565000	560000	641000	689000	689000	583000	749000	834000	769000	587000	593000	566000	628000	603000	675000	628000	734000	596000	543000	510000	538000	698000	636000	654000
pme1228	221.1	114.8	1.58	220.085	C00643	5-Hydroxy-L-tryptophan	Amino acid derivatives	15100000	14900000	14700000	14200000	16500000	17900000	17300000	17000000	20400000	20900000	20700000	14100000	13900000	12900000	15600000	15900000	16400000	8920000	8410000	8580000	12300000	12500000	11900000	13000000	13600000	13100000
pme1242	322.4	176.1	1.23	321.1	C11347	S-(methyl)glutathione	Amino acid derivatives	169000	176000	178000	220000	199000	173000	178000	185000	344000	335000	296000	223000	127000	104000	260000	254000	233000	144000	164000	133000	141000	173000	205000	216000	305000	118000
pme1261	206.1	188.2	2.29	205.131	C05944	Pantothenol	Alcohols and polyols	373000	355000	346000	348000	348000	356000	341000	362000	293000	306000	300000	1300000	1280000	1240000	239000	236000	236000	417000	328000	396000	119000	140000	135000	331000	369000	328000
pme1286	385	136.1	1.31	384.122	C00021	S-(5'-Adenosy)-L-homocysteine	Amino acid derivatives	7930000	8680000	8570000	8070000	8560000	8810000	8600000	8540000	7240000	7220000	7160000	9290000	8900000	8940000	6350000	6210000	5600000	7630000	7410000	8090000	7540000	7340000	7580000	9120000	8510000	8900000
pme1294	283	151.1	1.77	284.076	C01762	Xanthosine	Nucleotide and its derivates	15100000	15600000	16500000	16100000	16100000	16400000	17200000	16400000	27400000	27500000	27400000	19900000	19400000	18100000	19100000	18400000	18100000	23100000	22900000	23100000	15900000	15500000	14900000	20900000	20300000	20000000
pme1299	183	137.1	1.4	184.037	C05580	"Dl-3,4-Dihydroxymandelic acid"	Others	5130	3970	5900	10300	6090	8880	13800	5770	15100	7080	8320	14200	5360	5380	6090	5060	7510	9530	3890	10900	5170	7540	5270	9110	11000	7920
pme1313	237.1	146.1	2.05	236.08	C02700	N'-Formylkynurenine	Amino acid derivatives	16700000	17900000	16800000	15800000	17100000	17700000	18000000	17100000	14300000	14800000	14400000	43500000	42400000	40000000	41400000	39300000	40100000	19900000	19300000	19500000	21100000	21300000	20600000	18400000	18100000	17600000
pme1346	300.1	168.1	1.48	299.087	-	8-Hydroxyguanosine	Nucleotide and its derivates	1950000	1690000	1740000	1570000	1690000	1770000	1820000	1820000	932000	931000	816000	942000	947000	843000	951000	1000000	1040000	1040000	1030000	852000	1080000	959000	931000	924000	901000	810000
pme1363	662.1	540.1	1.13	663.109	C00003	Nicotinic acid adenine dinucleotide	Nucleotide and its derivates	965000	1040000	942000	1030000	1070000	940000	986000	1090000	1540000	1590000	1410000	1400000	1560000	1440000	921000	844000	875000	1500000	1480000	1520000	806000	809000	733000	1910000	1850000	1790000
pme1368	128	126	1.15	129.079	C00408	L-Pipecolic acid	Amino acid derivatives	372000	376000	309000	323000	292000	381000	384000	426000	284000	283000	293000	352000	275000	304000	110000	118000	104000	84800	94500	92700	822000	718000	795000	458000	460000	422000
pme1376	308	112	1.25	307.057	C00239	2'-Deoxycytidine-5'-monophosphate	Nucleotide and its derivates	451000	501000	521000	404000	589000	493000	465000	594000	791000	783000	826000	767000	835000	729000	361000	363000	526000	583000	815000	587000	697000	567000	658000	348000	340000	322000
pme1378	282.1	150.1	2.31	281.112	C02494	1-Methyladenosine	Nucleotide and its derivates	118000	102000	88000	76900	103000	137000	145000	125000	79600	106000	92400	114000	93100	90200	74500	68600	68100	124000	100000	114000	75900	57900	73100	68000	72200	67100
pme1383	170.1	134.1	1.11	169.074	C00314	Pyridoxine	Vitamins	8120000	9180000	9650000	9180000	8980000	9500000	9380000	9470000	8640000	9060000	8700000	3370000	3260000	2860000	31300000	31500000	30800000	12600000	12800000	13300000	19600000	19500000	19600000	12700000	12900000	12600000
pme1408	145.1	127.1	0.74	146.069	C00064	L-Glutamine	Amino acids	2390000	2510000	2580000	2450000	2370000	2410000	2420000	2580000	1280000	1280000	1340000	2400000	2240000	2400000	2150000	2320000	2300000	2340000	2290000	2460000	3170000	3310000	3210000	2110000	1940000	1990000
pme1417	161.1	144.2	2.72	160.1	C00398	L-Tryptamine	Tryptamine derivatives	25800000	29700000	30500000	29200000	30600000	33500000	30700000	30400000	2840000	2990000	3380000	5110000	4660000	5250000	6720000	6600000	7400000	4520000	4540000	4690000	28300000	28500000	26000000	4420000	3930000	4010000
pme1419	164	61	1.77	163	-	L-Methionine methyl ester	Amino acid derivatives	263000	293000	374000	351000	339000	341000	236000	255000	159000	192000	237000	195000	201000	202000	363000	334000	371000	336000	281000	355000	404000	370000	419000	299000	280000	321000
pme1436	163	119	3.83	164.047	C00811	p-Coumaric acid	Hydroxycinnamoyl derivatives	12200000	12900000	12100000	13100000	13200000	11600000	11500000	12100000	27700000	20200000	20600000	10600000	11900000	12400000	16500000	16400000	16100000	15600000	15400000	15700000	13800000	13100000	12700000	12300000	12100000	11600000
pme1450	231	144.1	4.61	232.121	C01598	Melatonin	Tryptamine derivatives	130000	133000	138000	132000	123000	122000	130000	127000	116000	101000	109000	91300	80800	86900	120000	118000	103000	110000	111000	105000	84100	94400	88400	113000	86900	87800
pme1474	298	135.1	2.85	297.09	C00170	5'-Deoxy-5'-(methylthio)adenosine	Nucleotide and its derivates	6950000	6180000	5990000	6010000	5980000	6330000	6090000	5780000	5890000	6500000	6520000	6860000	6750000	6200000	7190000	7150000	6620000	6600000	6600000	6390000	6940000	7060000	7150000	5750000	5290000	5770000
pme1480	319	319	4.39	318.038	C10107	Myricetin	Flavonol	128000	144000	201000	119000	99000	133000	126000	149000	129000	0	152000	147000	178000	72600	174000	300000	175000	243000	268000	190000	117000	105000	87200	282000	288000	200000
pme1496	267.1	252.1	6.27	268.074	C00858	Formononetin (4'-O-methyldaidzein)	Isoflavone	7080	9500	7860	8210	8820	9050	9030	8190	11800	10800	11500	10300	10400	10500	8540	8190	8050	9950	7480	8010	7970	9310	10200	8180	9320	7830
pme1500	313.1	283.1	7.2	314.079	-	Kumatakenin	Flavonol	38700	35800	36100	32900	37200	37200	37700	34000	18200	9940	13700	110000	76500	77200	20800	27500	26000	15600	15300	18500	27000	19600	14200	37100	37500	30400
pme1514	305	125	2.53	306	C12136	Epigallocatechin (EGC)	Catechin derivatives	1210000	1220000	1250000	1200000	1200000	1240000	1210000	1240000	464000	424000	411000	363000	343000	351000	259000	271000	212000	376000	361000	334000	394000	391000	338000	720000	724000	696000
pme1518	403.1	373.1	7.02	402.132	C10112	Nobiletin	Flavone	98000	97600	94700	86600	107000	97100	92900	99200	86100	89500	91400	167000	153000	143000	361000	352000	319000	100000	74700	75700	64000	58000	53200	69200	63800	63100
pme1524	305.1	153	4.08	304.058	C01617	Dihydroquercetin (Taxifolin)	Flavonol	1400000	1430000	1530000	1220000	1370000	1500000	1460000	1550000	1200000	1100000	1050000	927000	1050000	889000	840000	1120000	1000000	1250000	1450000	1080000	1270000	1230000	1160000	1920000	1990000	1750000
pme1535	305	125	2.44	306.074	C12127	(+)-Gallocatechin (GC)	Catechin derivatives	1170000	1200000	1190000	1150000	1220000	1130000	1220000	1140000	446000	408000	426000	390000	352000	350000	243000	255000	225000	358000	334000	322000	384000	394000	384000	742000	761000	702000
pme1539	623.2	314	3.75	624.169	-	Isorhamnetin 3-O-neohesperidoside	Flavonol	6730000	6760000	6810000	6620000	6180000	6290000	7690000	7450000	9730000	9040000	8130000	6300000	5960000	6440000	12200000	13600000	12800000	9530000	10500000	11700000	6320000	5870000	6220000	16000000	16900000	16800000
pme1541	283.1	268	6.98	284.069	C01470	Acacetin	Flavone	368000	381000	376000	377000	370000	390000	388000	354000	149000	133000	60600	540000	511000	357000	56600	73300	75100	79300	91600	59600	64100	53800	40500	48800	47900	35300
pme1550	373.1	373.1	7.5	372.121	C10190	Tangeretin	Flavone	99100	118000	101000	113000	115000	110000	117000	125000	144000	152000	141000	304000	293000	291000	248000	242000	239000	80300	85000	79600	78300	78200	78100	88800	83200	75300
pme1552	465.1	303.2	3.54	464.096	C10108	Myricetin 3-O-rhamnoside (Myricitrin)	Flavonol	304000	265000	280000	218000	244000	264000	234000	273000	146000	128000	110000	379000	414000	365000	0	0	0	106000	128000	108000	145000	120000	330000	554000	479000	493000
pme1568	285	257.1	5.05	286.048	C10510	"Orobol (5,7,3',4'-tetrahydroxyisoflavone)"	Isoflavone	198000	190000	179000	184000	227000	198000	213000	208000	129000	126000	79800	0	0	0	123000	144000	133000	174000	166000	117000	52400	48700	0	0	0	0
pme1580	287.1	135.1	5.03	288.063	C05631	Eriodictyol	Flavanone	5770000	5930000	6070000	5880000	5890000	6030000	5980000	5940000	1690000	1780000	1440000	2510000	2370000	2100000	710000	753000	746000	948000	932000	863000	3620000	3410000	3000000	1390000	1330000	1180000
pme1587	417.1	255.1	3.52	416.111	C10216	Daidzein 7-O-glucoside (Daidzin)	Isoflavone	1710000	1090000	1020000	1040000	845000	970000	793000	935000	1210000	1280000	997000	1040000	913000	985000	1190000	995000	1420000	814000	671000	752000	1490000	1160000	1030000	637000	832000	834000
pme1588	315.1	300.1	5.81	316.058	C10084	Isorhamnetin	Flavonol	5220000	5200000	5050000	5120000	5240000	5390000	5140000	5130000	583000	516000	212000	558000	505000	305000	200000	447000	442000	737000	766000	439000	246000	205000	122000	446000	390000	223000
pme1598	463.1	301.1	3.81	464.132	-	Hesperetin 5-O-glucoside	Flavanone	2920000	2570000	3100000	2750000	2760000	2600000	2530000	2450000	2050000	2220000	2060000	2670000	2680000	2830000	2640000	2480000	2750000	2420000	2490000	2500000	1990000	2090000	2020000	2840000	2570000	2650000
pme1600	303.1	167.1	6.07	302.079	-	7-O-Methyleriodictyol	Flavanone	80400	72500	67900	76600	86900	85700	74600	75700	25400	30900	23700	20900	23200	23900	38600	37300	41700	38400	34500	36100	15700	14800	17400	19900	23200	22900
pme1606	595.2	287	3.83	594.159	-	Kaempferol 3-O-robinobioside (Biorobin)	Flavonol	590000000	603000000	575000000	614000000	561000000	560000000	642000000	616000000	635000000	618000000	646000000	591000000	572000000	600000000	624000000	622000000	652000000	619000000	619000000	608000000	632000000	644000000	610000000	623000000	611000000	625000000
pme1611	433.1	433	3.72	434.121	-	Isohemiphloin	Flavone	28300	36000	26500	36000	31300	40300	36600	26200	25600	25200	25300	23200	24500	0	33600	33900	32100	22900	24700	22700	32200	26300	42400	26600	17300	22800
pme1635	533.3	371.2	4.96	534.21	C16915	Arctiin	Others	120000	124000	95500	107000	111000	106000	113000	102000	304000	311000	332000	103000	105000	120000	207000	199000	196000	364000	323000	372000	68000	43800	61600	60500	48300	49500
pme1637	179.1	146.1	3.86	180.079	C00590	Coniferyl alcohol	Hydroxycinnamoyl derivatives	167000	162000	179000	166000	181000	170000	142000	113000	65500	70900	80100	114000	140000	122000	64500	67200	67300	69400	68200	56600	178000	211000	171000	115000	118000	117000
pme1646	357.1	136.1	5.36	358.142	-	Pinoresinol	Hydroxycinnamoyl derivatives	2720000	2810000	2750000	2860000	3000000	2970000	2780000	2750000	1560000	1470000	1570000	3010000	3170000	3070000	594000	558000	545000	480000	473000	528000	2360000	2430000	2460000	1540000	1580000	1510000
pme1662	287.1	287.1	6.92	286.084	C09833	sakuranetin	Flavone	745000	662000	569000	601000	657000	655000	654000	580000	321000	326000	317000	662000	641000	621000	905000	941000	930000	992000	976000	969000	288000	296000	269000	398000	385000	379000
pme1683	477.2	258.1	2.25	476.168	C12276	D-Pantothenic dcid	Organic acids	19300	13600	16200	20200	23500	21300	26500	24100	34800	31600	26900	38600	39500	27300	23900	25400	16600	25400	12000	17300	32100	31600	31400	59000	70900	68000
pme1691	147.1	88	0.77	146.118	C08201	Acetylcholine	Cholines	669000	595000	749000	603000	703000	902000	699000	484000	327000	599000	323000	326000	384000	362000	336000	584000	650000	574000	343000	600000	887000	682000	818000	430000	536000	541000
pme1709	138.1	78	3.69	137.048	-	Nicotinic Acid Methyl Ester (Methyl Nicotinate)	Vitamins	3680000	4370000	4290000	4520000	4680000	4770000	4890000	4990000	6390000	6610000	6730000	3350000	3130000	2860000	7970000	7790000	7350000	4320000	4440000	4520000	4210000	4010000	4130000	3600000	3660000	3730000
pme1711	117.1	99.9	2.09	118.063	-	3-Hydroxy-3-methyl butyric acid	Organic acids	1700000	1920000	1870000	1870000	1750000	1710000	1870000	1790000	1970000	2160000	1920000	1700000	1770000	1790000	2000000	1910000	1900000	1350000	1290000	1400000	1900000	1740000	1880000	1520000	1510000	1380000
pme1712	275	257.1	0.71	276.132	C00449	L-Saccharopine	Amino acid derivatives	675000	734000	775000	710000	777000	809000	748000	828000	589000	526000	582000	805000	672000	704000	1050000	924000	929000	1230000	1210000	1260000	707000	683000	644000	520000	498000	570000
pme1730	117	99.8	0.73	118.027	-	D-Erythronolactone	Organic acids	78600	45400	41100	45700	65400	67000	61200	83400	23600	18200	14600	23800	23900	21000	26200	34500	31700	9880	26300	22100	46200	29900	37900	54100	53800	21700
pme1814	153	108.1	2.57	154.027	C00628	"2,5-dihydroxybenzoic acid (Gentisic acid)"	Benzoic acid derivatives	1690000	1810000	2000000	1920000	1960000	1890000	1910000	1800000	2390000	2370000	2110000	1510000	1370000	1270000	1600000	1690000	1710000	1340000	1310000	1280000	2030000	2060000	1790000	936000	933000	864000
pme1816	353	191.1	2.58	354.095	C17147	Neochlorogenic acid (5-O-Caffeoylquinic acid)	Quinate and its derivatives	3520000	3400000	3280000	3160000	3170000	3230000	3070000	3270000	279000	386000	384000	390000	273000	484000	5370000	5560000	5870000	646000	712000	681000	603000	591000	567000	8040000	7810000	7600000
pme1820	151	107.1	3.25	152.047	C00642	p–Hydroxyphenyl acetic acid	Organic acids	1270000	1390000	1370000	1550000	1410000	1480000	1420000	1410000	1250000	1120000	1100000	1320000	1340000	1250000	4980000	5410000	5250000	143000	127000	160000	1600000	1570000	1590000	2260000	2320000	2530000
pme1824	153.1	109.1	2.55	154.027	C00230	Protocatechuic acid	Catechin derivatives	10600000	11100000	10700000	10700000	11200000	11000000	10400000	11400000	14400000	13900000	12200000	7580000	8160000	7320000	8780000	9510000	9800000	7490000	7060000	6970000	11700000	12100000	9930000	4870000	4620000	4330000
pme1828	118.1	118.1	0.78	117.079	C00719	Betaine	Alkaloids	6950000	6330000	5990000	7230000	6720000	6310000	6870000	6690000	7370000	7440000	8020000	11300000	10800000	10800000	5620000	5330000	6300000	6170000	6960000	6670000	6320000	6180000	6260000	7230000	8060000	8000000
pme1830	117	99.9	1.31	118.027	C00042	Succinic acid	Organic acids	35100000	30800000	31600000	32300000	30500000	30100000	27500000	30900000	21800000	22000000	20900000	32600000	31900000	31800000	32400000	28700000	31900000	44800000	41500000	44100000	49700000	50200000	48100000	35200000	32000000	33300000
pme1841	103	86.1	0.62	102.116	C01672	"1,5-Diaminopentane"	Phenolamides	77400	79500	108000	91100	83300	76200	81300	75700	55300	64800	47300	55500	62100	49500	50300	45300	63700	71000	70400	50800	76100	79600	60100	70000	68900	94200
pme1846	179	70.9	0.76	180.063	C00031	D(+)-Glucose	Carbohydrates	8930000	9300000	8990000	9010000	8880000	8550000	9070000	9220000	8180000	8340000	8090000	8610000	8980000	8530000	9040000	9780000	8890000	10600000	10500000	10100000	8570000	8800000	9130000	9560000	9280000	8890000
pme1851	130.1	88	0.93	131.07	C00300	Creatine	Organic acids	785000	748000	660000	789000	783000	640000	695000	673000	653000	728000	688000	547000	411000	491000	653000	728000	750000	923000	942000	847000	643000	655000	686000	523000	489000	533000
pme1944	183.1	111	0.79	182.079	C00392	D-Mannitol	Alcohols and polyols	2050000	2310000	2690000	2330000	2180000	2490000	2240000	2570000	1160000	1510000	1270000	2130000	2010000	2170000	762000	598000	457000	930000	982000	896000	2190000	2050000	2040000	959000	831000	745000
pme1952	377	243.2	3.21	376.138	C00255	Riboflavin	Vitamins	30500000	29900000	28200000	29400000	30100000	32100000	31000000	28400000	22300000	22500000	22400000	21800000	21500000	17100000	20700000	18700000	19400000	22900000	21800000	22900000	18400000	16900000	17600000	13000000	13700000	13900000
pme1966	126	126	0.84	125.015	C00245	2-Aminoethanesulfonic acid	Organic acids	724000	696000	689000	664000	789000	1010000	805000	1230000	775000	672000	475000	761000	651000	646000	445000	575000	638000	747000	962000	875000	713000	516000	626000	350000	419000	321000
pme1977	173.1	83	3.82	174.089	C08278	Suberic acid	Organic acids	176000	180000	182000	168000	184000	141000	151000	150000	146000	78000	124000	185000	201000	196000	109000	109000	111000	126000	127000	144000	168000	214000	187000	150000	166000	146000
pme1988	90	71.8	0.78	89.048	C00041	L-Alanine	Amino acids	9760000	7270000	11700000	9800000	8000000	8900000	9610000	9810000	8490000	9530000	8760000	16900000	15300000	14400000	4730000	6150000	6000000	7150000	7370000	6450000	12300000	9110000	14600000	9350000	11900000	10000000
pme2019	149	58.9	0.77	150.053	-	DL-Arabinose	Carbohydrates	2050000	2550000	2380000	2270000	1990000	2390000	2090000	2390000	2150000	2180000	2200000	1850000	1820000	1710000	2930000	2970000	2220000	2090000	2060000	2500000	2430000	1960000	2020000	2370000	2170000	2220000
pme2033	133	70.8	0.97	134.022	C00497	L(-)-Malic acid	Organic acids	26500000	15600000	24400000	23500000	24400000	23500000	23900000	23500000	26100000	27300000	27800000	31400000	31600000	32300000	24200000	24600000	23900000	25800000	26400000	26000000	26600000	24300000	25100000	27400000	27100000	26600000
pme2036	191	85	1.13	192.063	C00296	Quinic acid	Quinate and its derivatives	1690000	1580000	1950000	1530000	2180000	2060000	1540000	1490000	911000	1160000	756000	696000	584000	649000	1470000	1010000	1010000	1200000	1090000	1120000	1070000	1230000	1500000	1200000	1160000	1040000
pme2046	170	96	0.67	169.181	-	3-N-Methyl-L-histidine	Amino acid derivatives	123000	176000	216000	140000	146000	248000	276000	290000	446000	423000	409000	185000	199000	181000	132000	145000	94300	245000	205000	208000	188000	176000	179000	168000	152000	125000
pme2050	191	131	0.84	192.027	C00158	Citric acid	Organic acids	3000000	3100000	2970000	3160000	3010000	3140000	3290000	2910000	1720000	1750000	1630000	1340000	1400000	1300000	1870000	2140000	1960000	1540000	1630000	1530000	1890000	2210000	1930000	2200000	2320000	2440000
pme2108	163	103	0.7	162.113	C00318	L-Carnitine	Others	328000	278000	413000	334000	238000	281000	178000	201000	209000	258000	255000	213000	178000	212000	216000	220000	318000	316000	375000	214000	391000	422000	298000	370000	435000	262000
pme2111	175	87	0.99	176.12	C00072	L-ascorbate	Vitamins	511000	512000	580000	635000	608000	590000	504000	589000	579000	685000	665000	440000	616000	627000	655000	549000	586000	581000	502000	511000	603000	602000	748000	7630000	7720000	10700000
pme2122	112.1	94.6	0.63	111.08	C00388	Histamine	Amino acid derivatives	51200	84000	72200	60800	82500	90300	76100	86800	113000	109000	99500	151000	121000	120000	80200	77100	88100	108000	111000	78000	88000	113000	109000	37600	41000	33900
pme2129	131.1	68.9	3.51	132.079	-	(S)-(-)-2-Hydroxyisocaproic acid	Organic acids	1280000	1340000	1330000	1460000	1410000	1420000	1400000	1300000	1300000	1320000	1280000	1210000	1240000	1210000	1210000	1190000	1190000	1620000	1570000	1650000	1100000	1100000	1020000	844000	864000	856000
pme2131	165.1	106	3.86	166.063	-	3-(3-hydroxyphenyl)propionate acid	Organic acids	24100	24300	23800	29300	33700	29400	28400	32300	51500	42300	37300	31600	31400	25500	31100	25300	26500	7160	7290	9190	17300	21600	15900	30100	28000	29600
pme2165	155	111	1.08	156.017	C00295	Orotic acid	Vitamins	822000	1000000	949000	1050000	959000	603000	722000	921000	608000	531000	553000	242000	269000	246000	537000	674000	564000	561000	509000	504000	971000	795000	993000	687000	564000	590000
pme2237	181.1	70.8	0.75	182.079	C01697	Dulcitol	Alcohols and polyols	15100000	16300000	15900000	16000000	16200000	15700000	16000000	16400000	10400000	10400000	10500000	10500000	10300000	10600000	7550000	8030000	7920000	9340000	9230000	8950000	14300000	15000000	14600000	16100000	15500000	15600000
pme2246	301	58.8	3.75	302.006	C10788	Ellagic acid	Others	159000	173000	187000	184000	172000	199000	176000	153000	21100	0	0	12600	22000	0	0	0	0	0	0	0	0	0	0	0	0	0
pme2253	177.1	74.8	0.81	178.048	C01040	L-Gulonic-γ-lactone	Carbohydrates	7390000	7960000	6720000	7450000	6020000	3270000	7040000	7630000	7480000	8620000	7680000	4170000	4520000	5230000	6270000	6630000	5200000	4530000	4630000	4520000	5190000	5930000	5120000	5730000	6790000	5350000
pme2256	151.1	70.8	0.73	152.069	C01904	D-Arabitol	Alcohols and polyols	103000	102000	113000	104000	110000	119000	101000	112000	120000	143000	141000	120000	112000	120000	89000	106000	96300	87100	95700	72900	78100	88800	90900	120000	103000	102000
pme2266	245.1	227.1	3.32	244.088	C00120	Biotin	Vitamins	2200000	2200000	1920000	2170000	2170000	2110000	2170000	2120000	1510000	1320000	1470000	1780000	1640000	1530000	954000	1080000	1010000	1150000	1120000	1250000	2010000	1990000	2020000	1450000	1420000	1480000
pme2268	138	137.9	0.79	137.048	C01004	Trigonelline	Alkaloids	5740000	5570000	5370000	5370000	5480000	5450000	5710000	5380000	5450000	6130000	6090000	5330000	5580000	5260000	6090000	6760000	7620000	4630000	4920000	4780000	5390000	4900000	4940000	6340000	6550000	6420000
pme2277	152	108.1	1.34	153.043	-	3-Aminosalicylic acid	Organic acids	215000	222000	185000	184000	175000	187000	195000	209000	149000	210000	170000	257000	278000	264000	171000	149000	150000	142000	177000	140000	223000	192000	245000	218000	217000	183000
pme2278	362	78.9	1.15	363.058	-	Guanosine monophosphate	Nucleotide and its derivates	727000	864000	867000	805000	915000	943000	913000	806000	579000	689000	599000	961000	796000	963000	609000	646000	651000	919000	880000	985000	1350000	1430000	1460000	631000	581000	548000
pme2292	89	71.9	0.64	88.1	C00134	Putrescine	Phenolamides	527000	592000	746000	706000	854000	639000	784000	419000	434000	401000	413000	702000	702000	545000	812000	947000	1630000	517000	571000	537000	1520000	1330000	1240000	457000	426000	388000
pme2344	231.2	149.1	6.16	230.152	-	Dodecanedioic aicd	Organic acids	126000	128000	126000	141000	122000	135000	156000	137000	104000	114000	87200	102000	122000	156000	185000	175000	173000	202000	191000	207000	100000	129000	115000	113000	99000	77500
pme2362	151	105	2.91	152.047	C01984	Mandelic acid	Organic acids	1140000	1290000	1020000	1380000	1330000	1260000	1350000	1270000	2050000	2420000	2420000	971000	994000	972000	2470000	2840000	2430000	2320000	2280000	2440000	822000	1030000	992000	1330000	1360000	1450000
pme2366	122.1	105	2.39	121.089	C05332	Phenethylamine	Others	14400000	14200000	14300000	14400000	15200000	14300000	13600000	13900000	3000000	3070000	3130000	2870000	2810000	2680000	7660000	7760000	7900000	6800000	6700000	6770000	4490000	4620000	4550000	4120000	3880000	3960000
pme2367	109	80.9	3.37	108.021	C00472	Quinone	Others	2500000	2880000	2790000	2700000	2740000	2530000	3120000	2530000	2780000	2830000	2760000	3010000	3140000	2710000	3000000	3160000	3280000	3380000	3470000	3240000	3060000	2400000	3090000	1760000	1080000	1710000
pme2380	145	80.8	1.13	146.022	-	A-Ketoglutaric acid	Organic acids	1010000	1020000	965000	1070000	977000	860000	961000	902000	534000	550000	515000	1210000	1020000	923000	417000	424000	414000	598000	624000	575000	885000	880000	986000	697000	726000	739000
pme2427	222.1	163	2.61	223.085	-	N-Acetyl-L-tyrosine	Amino acid derivatives	567000	576000	558000	545000	509000	540000	592000	523000	494000	539000	467000	534000	522000	560000	512000	492000	482000	1120000	1120000	1110000	712000	669000	675000	508000	476000	495000
pme2433	106	88.1	0.68	105.079	C06772	Diethanolamine	Others	64100	64200	77300	74100	82200	69300	95300	93300	41800	60800	60400	90400	85900	82900	86400	72300	66300	25800	62700	64800	88300	64900	58400	27300	51400	32900
pme2444	493.5	295.1	4.65	494.121	C10492	Salvianolic acid	Others	317000	308000	321000	336000	348000	252000	222000	278000	0	0	0	262000	222000	240000	0	0	0	286000	316000	348000	0	0	0	138000	126000	126000
pme2459	449.1	287.1	3.77	448.101	C03951	Luteolin 7-O-glucoside (Cynaroside)	Flavone	241000000	221000000	231000000	223000000	241000000	243000000	249000000	228000000	313000000	277000000	296000000	275000000	272000000	272000000	272000000	276000000	298000000	245000000	249000000	270000000	218000000	216000000	213000000	303000000	288000000	295000000
pme2478	137.1	137	3.05	138.032	C16700	Protocatechuic aldehyde	Catechin derivatives	563000	611000	634000	633000	655000	636000	597000	637000	647000	652000	656000	544000	547000	522000	504000	491000	472000	384000	402000	391000	615000	615000	561000	434000	452000	420000
pme2493	579.2	433.1	3.77	578.164	C16981	"Kaempferol 3,7-dirhamnoside (Kaempferitrin)"	Flavonol	512000	662000	675000	719000	351000	489000	715000	603000	823000	804000	471000	719000	761000	272000	749000	1060000	1120000	632000	638000	442000	299000	531000	246000	1960000	1980000	1330000
pme2527	133	70	0.65	132.16	C00077	L(+)-Ornithine	Amino acids	525000	552000	639000	550000	524000	559000	648000	714000	509000	628000	459000	943000	1080000	944000	243000	298000	411000	155000	147000	109000	447000	472000	349000	151000	207000	119000
pme2529	163.2	162.9	0.83	164.069	C07326	"1,5-Anhydro-D-glucitol"	Alcohols and polyols	89400	111000	144000	138000	124000	177000	122000	145000	79500	90100	86100	75200	84800	76600	84800	57800	75500	95400	103000	69500	126000	112000	104000	118000	106000	128000
pme2550	173	137	0.75	174.016	C00417	Cis-Aconitic acid	Organic acids	37500	52700	62400	54700	49900	51100	59600	56000	51700	75600	70900	0	36300	24700	27600	43300	32600	75500	54400	50000	69300	61100	42600	32500	34500	63100
pme2555	346	78.8	1.13	347.063	C00020	Adenosine 5'-monophosphate	Nucleotide and its derivates	3290000	3770000	3960000	4000000	4070000	4040000	4250000	4430000	4980000	4860000	4630000	4910000	4650000	4450000	3500000	3950000	3400000	3160000	3310000	3140000	9010000	10200000	9760000	2820000	2730000	2640000
pme2559	174	88	1.19	175.048	C01042	N-Acetylaspartate	Amino acid derivatives	57500	99300	102000	113000	77500	95700	105000	74100	87200	82600	89300	62600	85200	64200	100000	113000	76300	130000	130000	116000	81300	79700	80300	70000	69100	79200
pme2569	219	156.1	1.13	218.09	C03740	(5-L-Glutamyl)-L-amino acid	Amino acid derivatives	911000	816000	740000	747000	891000	731000	813000	924000	1650000	1840000	1800000	982000	892000	977000	458000	434000	463000	828000	714000	752000	967000	827000	854000	601000	613000	544000
pme2594	182.1	138.1	1.67	183.053	C00847	4-Pyridoxic acid	Pyridine derivatives	987000	950000	925000	925000	928000	952000	970000	916000	998000	1040000	1030000	1050000	1020000	1060000	1220000	1210000	1180000	705000	707000	679000	1080000	1120000	1090000	911000	889000	838000
pme2598	167.1	139	2.43	168.042	-	"3,4-Dihydroxybenzeneacetic acid"	Organic acids	200000	205000	229000	184000	228000	242000	220000	219000	329000	257000	274000	215000	210000	205000	90100	91100	133000	67700	93100	98800	171000	172000	192000	136000	149000	61700
pme2601	89	68.9	1.19	90.032	C01013	3-Hydroxypropanoic acid	Organic acids	54400	69000	117000	126000	131000	149000	155000	84800	106000	92600	100000	189000	106000	147000	81800	141000	152000	90200	109000	87600	55800	87200	120000	0	63600	92300
pme2603	152	108.1	2.67	153.043	C00632	3-Hydroxyanthranilic acid	Organic acids	163000	147000	202000	187000	163000	170000	146000	185000	189000	180000	198000	151000	140000	168000	160000	146000	156000	165000	184000	171000	99000	94400	118000	192000	210000	194000
pme2617	166	149.1	0.65	165.046	-	Methionine sulfoxide	Amino acid derivatives	1070000	1150000	1230000	1010000	1120000	1320000	1510000	1510000	922000	799000	825000	1550000	2070000	1300000	974000	1580000	1140000	545000	881000	894000	2030000	1280000	1810000	872000	649000	375000
pme2634	118	88	0.84	117.079	C01826	Dl-Norvaline	Amino acids	19700000	20700000	23500000	21100000	23100000	22600000	22500000	22200000	20500000	23000000	21100000	31600000	30700000	28800000	29200000	29700000	33200000	28500000	29600000	28000000	25000000	24600000	23000000	20300000	22300000	20000000
pme2651	742.1	620.2	1.22	743.075	C00006	NADP	Others	172000	177000	195000	150000	153000	138000	155000	129000	116000	149000	145000	213000	190000	178000	170000	160000	154000	148000	178000	137000	165000	176000	147000	193000	189000	218000
pme2670	121	91.9	3.69	122.037	C00633	4-Hydroxybenzaldehyde	Benzoic acid derivatives	5230000	5240000	5310000	5330000	5380000	5100000	5250000	5290000	5200000	5160000	5010000	4480000	4510000	4430000	6890000	6930000	6770000	3780000	3850000	3850000	5820000	5670000	5560000	5630000	5370000	5330000
pme2693	131	71.9	0.72	130.111	C02714	N-Acetylputrescine	Phenolamides	436000	562000	661000	626000	869000	825000	803000	541000	774000	619000	772000	731000	522000	513000	407000	385000	430000	1300000	1170000	1150000	481000	440000	551000	217000	340000	249000
pme2698	313.4	120	3.52	312.147	-	Phe-Phe	Amino acid derivatives	1110000	1110000	1000000	1060000	1100000	1120000	1030000	1020000	1310000	1350000	1450000	611000	619000	632000	2130000	2050000	1980000	1500000	1360000	1480000	799000	716000	700000	1420000	1340000	1480000
pme2706	153.2	109	2.64	154.027	C00196	"2,3-Dihydroxybenzoic acid"	Organic acids	11000000	11800000	11800000	12200000	11800000	11900000	11800000	12200000	15100000	15200000	13600000	9500000	8950000	7950000	9430000	10800000	10800000	8380000	7840000	7750000	12700000	12700000	11100000	5540000	5770000	5740000
pme2723	146.1	118.1	4.49	145.053	C08493	Indole-3-carboxaldehyde	Indole derivatives	1220000	1430000	1280000	1250000	1380000	1510000	1430000	1300000	1580000	1520000	1530000	1260000	1250000	1200000	3170000	3230000	2920000	913000	913000	867000	3740000	3670000	3530000	1310000	1300000	1310000
pme2735	399.2	250.1	0.76	398.137	C00019	S-(5'-Adenosyl)-L-methionine	Amino acid derivatives	66600000	65300000	69400000	62700000	62800000	76900000	71100000	71000000	54100000	55900000	56200000	76600000	76700000	69600000	78800000	77400000	69500000	84000000	79400000	83400000	73300000	77800000	82900000	67400000	72200000	65800000
pme2746	784.2	437.2	2.78	785.157	C00016	Flavin adenine dinucleotide (FAD)	Nucleotide and its derivates	892000	1000000	939000	847000	970000	952000	1030000	953000	996000	895000	1080000	1090000	1070000	1140000	970000	914000	833000	1030000	1050000	932000	869000	988000	1020000	771000	726000	799000
pme2755	222	138.1	0.6	221.09	C00140	N-Acetyl-D-glucosamine	Carbohydrates	45300000	41300000	72900000	55700000	94400000	125000000	93300000	108000000	89000000	132000000	114000000	82100000	105000000	138000000	41000000	31500000	53100000	47200000	53300000	34000000	66700000	66200000	49900000	52500000	65600000	41800000
pme2758	162	144.1	0.78	163.129	C03079	4-Hydroxy-L-glutamic acid	Amino acid derivatives	74700	68900	73100	65700	81800	71100	79800	64100	75200	66100	72300	119000	123000	134000	34900	43300	33400	33800	23800	32600	93200	89800	94800	67400	60200	60900
pme2761	161	160.9	1.11	162.016	C01127	4-Hydroxy-2-oxoglutaric acid	Organic acids	155000	224000	155000	155000	164000	110000	191000	145000	108000	119000	155000	188000	209000	149000	253000	152000	298000	214000	242000	169000	174000	184000	161000	195000	190000	201000
pme2786	219	160.1	3.23	218.106	C00978	N-Acetyl-5-hydroxytryptamine	Tryptamine derivatives	1690000	2210000	1970000	1990000	2130000	1820000	1830000	1790000	1670000	1680000	1930000	2500000	2630000	2490000	2580000	2550000	2920000	2230000	1960000	2180000	1900000	1940000	1620000	1360000	1420000	1400000
pme2798	165	150.1	1.69	166.049	C16353	7-Methylxanthine	Nucleotide and its derivates	259000	294000	309000	283000	295000	300000	304000	282000	331000	317000	308000	422000	415000	396000	251000	218000	228000	260000	233000	254000	320000	274000	286000	202000	221000	216000
pme2827	239	223	6.74	240.245	C00517	Palmitaldehyde	Lipids_Fatty acids	15600000	16700000	16700000	17300000	19500000	18600000	19400000	21200000	9550000	8320000	10100000	8340000	8910000	9690000	8880000	8340000	8450000	7480000	7490000	8300000	9420000	15100000	12900000	8840000	10300000	9180000
pme2830	140	78.5	0.71	141.019	-	O-Phosphorylethanolamine	Others	444000	465000	440000	429000	425000	429000	432000	453000	478000	501000	494000	414000	433000	441000	582000	579000	578000	495000	486000	485000	607000	596000	629000	372000	352000	365000
pme2890	269	134	0.81	268.055	C01817	L-Homocystine	Amino acids	140000	223000	188000	205000	159000	233000	198000	224000	136000	101000	127000	123000	131000	131000	123000	106000	211000	136000	170000	136000	143000	244000	268000	145000	159000	110000
pme2895	319.1	193	3.47	320.053	C02906	Dihydromyricetin	Flavonol	133000	142000	142000	145000	159000	140000	132000	163000	161000	165000	138000	111000	145000	142000	169000	175000	191000	141000	135000	120000	195000	204000	176000	157000	170000	170000
pme2901	353.1	191.1	2.38	354.095	-	1-O-Caffeoyl quinic acid	Quinate and its derivatives	239000000	239000000	236000000	238000000	234000000	254000000	241000000	240000000	59900000	71500000	56600000	63500000	93300000	80300000	349000000	345000000	335000000	131000000	133000000	150000000	97400000	91100000	99900000	407000000	399000000	405000000
pme2903	137	92.5	3.05	138.032	C00156	4-Hydroxybenzoic acid	Organic acids	23900000	26400000	24900000	28000000	24800000	24300000	24500000	23300000	31400000	29300000	29500000	20300000	21100000	21100000	22000000	23600000	22300000	23500000	21700000	23700000	21800000	22300000	24200000	22100000	22000000	22900000
pme2914	161	56.8	1.4	162.053	C03761	"3-Hydroxy-3-methylpentane-1,5-dioic acid"	Amino acid derivatives	11100000	11800000	10400000	11500000	11000000	11600000	11500000	11000000	9730000	9070000	8670000	8110000	7500000	8010000	10300000	10800000	10700000	8520000	8590000	8930000	9790000	9110000	10200000	10600000	10900000	10500000
pme2949	609.2	301.1	3.96	610.19	C09755	Hesperetin 7-rutinoside (Hesperidin)	Flavanone	4700000	4920000	4590000	5150000	4480000	4630000	5130000	5110000	5490000	5030000	4830000	6880000	6960000	6240000	5210000	5510000	5980000	5870000	5660000	6700000	4540000	4630000	5010000	4750000	5290000	5840000
pme2960	273.1	153.1	5.47	272.069	C06561	Naringenin chalcone	Flavanone	41200000	39800000	38300000	38200000	39100000	39800000	38200000	37600000	7280000	7470000	6320000	19400000	18700000	17300000	2820000	3320000	3050000	3470000	3370000	3150000	21200000	20300000	19800000	6840000	6680000	6190000
pme2963	287.1	125.1	4.58	288.063	C00974	Aromadedrin (Dihydrokaempferol)	Flavonol	14500000	14900000	14200000	13800000	14700000	15200000	15000000	14200000	2750000	2710000	2440000	4580000	4280000	4250000	1040000	1080000	1020000	1560000	1550000	1520000	9440000	9370000	8940000	2440000	2260000	2200000
pme2979	255.1	151.1	7.03	256.074	C09827	Pinocembrin (Dihydrochrysin)	Flavanone	8190000	8510000	8490000	8540000	8520000	8870000	8610000	8070000	875000	902000	822000	3570000	3590000	3430000	115000	115000	102000	155000	167000	129000	1960000	1930000	1860000	913000	903000	844000
pme2984	593	285.2	4.9	594.195	C09830	Isosakuranetin-7-neohesperidoside (Poncirin)	Flavanone	25300000	23000000	26500000	20300000	27100000	22600000	25300000	21500000	11000000	10500000	8990000	0	17000000	15000000	17300000	12600000	14500000	11000000	9460000	11700000	13500000	13800000	13600000	15600000	14500000	12800000
pme2988	149.2	107	5.6	148.052	C02274	"3,4-Dihydrocoumarin"	Coumarins	319000	344000	273000	315000	303000	301000	323000	279000	387000	374000	399000	345000	377000	315000	350000	345000	320000	453000	476000	442000	248000	258000	291000	254000	233000	271000
pme2991	191	176.1	4.11	192.042	C01752	Scopoletin (7-Hydroxy-5-methoxycoumarin)	Coumarins	219000	227000	217000	243000	233000	217000	221000	218000	116000	94000	96500	104000	116000	119000	79300	70000	84300	41500	51100	48900	273000	300000	289000	181000	181000	165000
pme3007	403	159	0.68	404.161	C00015	Uridine 5’-diphosphate	Nucleotide and its derivates	100000	103000	107000	105000	116000	124000	123000	129000	140000	133000	120000	137000	141000	127000	95100	111000	97900	112000	110000	120000	122000	102000	112000	161000	138000	148000
pme3009	175	98.9	0.59	174.016	-	trans-Citridic acid	Organic acids	932000	931000	1180000	1120000	1360000	1320000	1000000	1040000	716000	812000	789000	1300000	1450000	1400000	802000	741000	1100000	1090000	1210000	994000	1870000	1960000	1390000	1010000	1210000	879000
pme3011	104.1	87	0.77	103.063	C00334	γ-aminobutyric acid	Organic acids	3680000	4260000	5180000	4410000	5900000	5400000	5640000	4510000	4010000	3940000	4240000	5200000	4440000	4450000	3080000	3030000	3450000	8330000	8600000	8210000	5230000	4460000	4770000	3780000	4390000	4280000
pme3017	104	85.9	0.74	103.063	C03665	2-Aminoisobutyric acid	Amino acid derivatives	6330000	7680000	6850000	7320000	6780000	7590000	7620000	7630000	7740000	7820000	7380000	5020000	5440000	4680000	6850000	6680000	7140000	6130000	5830000	6150000	7570000	7430000	7150000	6150000	6500000	5870000
pme3033	104	58	0.75	103.063	C01026	"N,N-Dimethylglycine"	Amino acid derivatives	5470000	5740000	6250000	5960000	6230000	6270000	6290000	6380000	5810000	5990000	5510000	4890000	4860000	4870000	4680000	5020000	5370000	6670000	7180000	6940000	6450000	6150000	5930000	5080000	5270000	4790000
pme3034	131	86.9	1.89	132.042	-	ethylmalonate	Organic acids	158000	184000	154000	173000	158000	169000	174000	168000	97400	108000	104000	60200	54600	66000	117000	135000	127000	189000	187000	178000	204000	216000	209000	109000	91700	90700
pme3038	130	83.9	1.04	129.043	C01879	5-oxoproline	Amino acid derivatives	10000000	12100000	12300000	11300000	12400000	12700000	12200000	12100000	7850000	8830000	8110000	7890000	7210000	6980000	3090000	3330000	3260000	4800000	5060000	4810000	18900000	20000000	18800000	14800000	15500000	14900000
pme3069	556.3	371.2	10.22	555.284	C05122	Taurocholic acid	Organic acids	706000	697000	687000	645000	667000	575000	716000	679000	990000	958000	1090000	1110000	1040000	1080000	1250000	1240000	1260000	1110000	1040000	1170000	1160000	1170000	1000000	1160000	1150000	1260000
pme3081	169.1	134.1	0.66	168.09	C00534	4-(Aminomethyl)-5-(hydroxymethyl)-2-methylpyridin-3-ol	Others	227000	264000	305000	259000	288000	284000	292000	297000	161000	230000	203000	223000	183000	162000	458000	525000	526000	348000	358000	345000	391000	340000	310000	382000	303000	343000
pme3083	164	92	3.84	165.043	-	2-(Formylamino)benzoic acid	Organic acids	1350000	1310000	1500000	1500000	1500000	1310000	1430000	1350000	2380000	1930000	2210000	1360000	1440000	1440000	2040000	1910000	2130000	1740000	1610000	1670000	2050000	2220000	2050000	1430000	1510000	1400000
pme3096	118	73.9	1.32	119.022	C00872	Aminomalonic acid	Organic acids	13900000	13300000	11400000	12500000	10200000	12100000	13500000	11900000	9030000	8950000	7850000	10800000	11400000	13000000	12400000	14200000	10700000	18000000	18300000	16900000	17800000	19900000	16700000	14700000	14000000	12600000
pme3104	150	133.1	1.03	149.07	C02216	1-Methyladenine	Nucleotide and its derivates	770000	855000	737000	917000	904000	917000	854000	910000	1080000	998000	967000	967000	882000	677000	1300000	1290000	1150000	1030000	1160000	1230000	949000	940000	931000	713000	767000	544000
pme3130	465	302.9	3.85	464.096	-	Quercetin 4'-O-glucoside (Spiraeoside)	Flavonol	7400000	7090000	7150000	6680000	6560000	7480000	7500000	6760000	6420000	6300000	5820000	7510000	7240000	7370000	7390000	7650000	7570000	7770000	7630000	7990000	3760000	3650000	3360000	6120000	6360000	6400000
pme3140	175	131.1	4.16	176.047	-	6-Hydroxy-4-methylcoumarin	Coumarins	498000	518000	598000	540000	523000	548000	548000	553000	402000	366000	384000	344000	366000	355000	390000	372000	348000	344000	344000	354000	417000	480000	427000	361000	331000	345000
pme3154	147.1	58.8	1.3	148.074	-	(Rs)-Mevalonic acid	Organic acids	546000	437000	656000	562000	652000	583000	695000	655000	652000	695000	667000	803000	770000	781000	1410000	894000	784000	565000	672000	530000	1040000	1030000	994000	924000	920000	966000
pme3160	259	96.9	0.69	260.03	C00092	D-Glucose 6-phosphate	Carbohydrates	892000	970000	990000	971000	928000	1030000	1030000	1090000	1210000	1160000	1100000	1210000	1280000	1220000	891000	945000	874000	901000	917000	925000	1120000	1160000	1140000	891000	889000	903000
pme3163	289	78.9	1.08	290.04	-	D-Sedoheptuiose 7-phosphate	Carbohydrates	3190000	3090000	2890000	2950000	2590000	2410000	2700000	2410000	1890000	1860000	1900000	3640000	3570000	3420000	2370000	2240000	2210000	2940000	3010000	2940000	3270000	3020000	3190000	2650000	2650000	2510000
pme3179	179	75.9	0.78	178.041	C01419	CYS-GLY	Amino acid derivatives	44700	40500	71000	73200	69400	60800	48900	32300	90500	75700	108000	132000	172000	151000	38300	32600	24400	61700	62400	67400	92600	58300	118000	211000	304000	308000
pme3184	332	136.1	1.14	331.068	C00360	2'-Deoxyadenosine-5'-monophosphate	Nucleotide and its derivates	1050000	1010000	1150000	1050000	1200000	1230000	1420000	1290000	562000	679000	619000	682000	710000	679000	704000	677000	726000	557000	590000	508000	1730000	1670000	1460000	765000	767000	688000
pme3186	169	122.8	1.07	169.998	-	Dl-Glyceraldehyde3-phosphate	Others	232000	235000	179000	210000	200000	150000	172000	192000	128000	150000	163000	224000	259000	232000	139000	147000	160000	154000	180000	142000	298000	270000	272000	263000	170000	203000
pme3188	323	78.8	1.23	324.036	C00105	Uridine 5'-monophosphate	Nucleotide and its derivates	2760000	3120000	2780000	2720000	3520000	3220000	2560000	2500000	2170000	2430000	2120000	3100000	2960000	2730000	2570000	2780000	2580000	3740000	4050000	3560000	3980000	3890000	4890000	2150000	2060000	1860000
pme3194	118	76	1.2	117.043	-	N-acetylglycine	Amino acid derivatives	613000	764000	730000	764000	923000	584000	877000	821000	528000	653000	707000	436000	1080000	1080000	1040000	845000	988000	1070000	1020000	1060000	762000	631000	550000	1020000	589000	1030000
pme3200	74	56.9	0.71	73.0971	-	1-methylguanidine	Nucleotide and its derivates	166000	145000	459000	270000	306000	337000	181000	273000	46800	143000	93400	199000	319000	430000	116000	36700	308000	226000	359000	79800	546000	637000	388000	264000	455000	137000
pme3210	433	270.9	3.93	432.106	C09126	Genistein 7-O-Glucoside (Genistin)	Isoflavone	554000	570000	592000	497000	620000	613000	528000	570000	839000	848000	865000	180000	444000	462000	605000	649000	633000	473000	604000	592000	893000	754000	775000	592000	631000	538000
pme3211	463	301.1	3.81	464.096	C05623	Quercetin 3-O-glucoside (Isotrifoliin)	Flavonol	2080000	2150000	2380000	2120000	2120000	1970000	1910000	1850000	1560000	1580000	1580000	2070000	1890000	1930000	1950000	1790000	2020000	2030000	2040000	2030000	1460000	1470000	1470000	2260000	2100000	2120000
pme3227	579	433.1	3.49	578.164	C12628	Vitexin 2''-O-beta-L-rhamnoside	Flavone C-glycosides	314000	281000	231000	337000	231000	265000	230000	283000	311000	311000	113000	317000	282000	297000	119000	208000	187000	320000	323000	242000	200000	309000	243000	336000	422000	366000
pme3246	341	179.1	2.72	342.132	C00761	Coniferin	Hydroxycinnamoyl derivatives	17000000	17900000	17500000	17500000	18000000	17800000	17500000	17400000	11200000	11300000	10900000	15900000	16800000	16000000	20000000	22800000	20100000	19800000	20000000	20100000	19400000	19900000	20300000	15800000	15700000	16200000
pme3250	285	270.2	7	284.069	C00814	Biochanin A	Isoflavone	229000	190000	186000	185000	200000	205000	204000	183000	188000	168000	91600	226000	193000	125000	51700	61500	66800	168000	178000	163000	49000	44700	39500	122000	114000	115000
pme3263	269	225	4.37	270.053	C02495	2'-Hydroxydaidzein	Isoflavone	32800	44000	42800	45800	48300	49000	34700	54200	56800	58100	58900	30800	26100	17800	18400	35500	36400	31200	29500	15000	23800	22100	24600	29000	28300	31200
pme3268	449	286.9	3.93	448.101	C12626	Kaempferol 3-O-galactoside (Trifolin)	Flavonol	30900000	31700000	30200000	29700000	31200000	32800000	31200000	29900000	24800000	21400000	19100000	39400000	38500000	32300000	26600000	30400000	30900000	31900000	33400000	29500000	18400000	17800000	15200000	28500000	27300000	23700000
pme3279	287	217.1	4.79	286.048	C12134	2'-Hydroxygenistein	Isoflavone	700000	1010000	908000	953000	975000	949000	815000	993000	842000	1000000	881000	895000	931000	681000	1030000	1170000	990000	1080000	886000	1020000	960000	753000	824000	992000	1040000	1060000
pme3282	273	97	3.29	274.084	C09320	"Afzelechin (3,5,7,4'-Tetrahydroxyflavan)"	Flavanone	225000	248000	256000	246000	217000	255000	236000	228000	183000	175000	154000	140000	145000	139000	123000	120000	129000	145000	136000	145000	239000	252000	233000	240000	225000	214000
pme3288	329	314	6.32	330.074	C01265	"3,7-Di-O-methylquercetin"	Flavonol	166000	171000	165000	164000	171000	178000	185000	162000	7890	8200	0	0	0	0	8550	13100	13100	15600	14600	11200	9920	7090	4060	0	0	0
pme3292	283	268.1	6.95	284.069	C10521	Prunetin	Isoflavone	398000	420000	418000	418000	419000	438000	415000	390000	158000	141000	75800	715000	571000	386000	59200	106000	101000	94400	100000	70400	73100	67500	43900	62600	59300	42500
pme3296	431	285.1	4.45	432.106	C16911	Kaempferol 3-O-rhamnoside (Kaempferin)	Flavonol	13700000	13000000	12900000	12100000	11700000	12700000	11700000	12000000	9490000	9090000	8910000	12200000	12100000	11900000	10400000	10200000	10100000	12700000	12700000	12400000	11100000	11000000	10600000	12400000	12500000	11900000
pme3300	301	149.1	4.38	302.043	C10192	Tricetin	Flavone	369000	521000	504000	539000	407000	372000	513000	468000	331000	329000	413000	503000	605000	402000	434000	449000	513000	465000	389000	400000	479000	516000	506000	646000	644000	630000
pme3309	145.1	101.1	2.63	146.058	-	2-Methylglutaric acid	Organic acids	1960000	2300000	2140000	2050000	2110000	2120000	2250000	2200000	1430000	1580000	1440000	1890000	2000000	1840000	1280000	1440000	1230000	1890000	1810000	1840000	2260000	2370000	2390000	1910000	1870000	1900000
pme3313	259	78.8	0.97	260.03	C00085	D-Fructose 6-phosphate	Carbohydrates	5060000	5350000	5440000	5550000	5330000	5840000	6100000	5970000	6950000	6390000	6540000	6940000	7080000	6810000	4890000	5360000	5190000	5200000	4770000	5190000	6380000	6560000	6330000	5440000	4800000	5080000
pme3333	153.1	136.1	1.48	152.059	-	"1,4-dihydro-1-Methyl-4-oxo-3-pyridinecarboxamide"	Pyridine derivatives	3360000	2560000	2450000	2820000	2550000	2620000	2820000	2690000	2340000	1970000	2440000	2090000	1840000	1950000	1850000	1780000	1550000	1650000	1630000	1570000	988000	1030000	1090000	2250000	2380000	2300000
pme3337	384	252.1	2.17	383.108	-	N6-Succinyl Adenosine	Nucleotide and its derivates	28400000	30500000	30600000	29900000	30500000	34400000	33700000	30600000	22000000	24000000	22000000	24700000	25200000	23900000	14700000	14900000	13600000	43100000	42700000	40600000	14600000	14000000	13800000	16500000	14700000	15400000
pme3346	131.1	70.8	2.63	132.079	-	5-hydroxyhexanoic acid	Organic acids	210000	202000	183000	189000	191000	192000	184000	185000	185000	181000	196000	180000	165000	168000	66900	38200	47500	124000	93600	1720000	124000	186000	167000	132000	113000	123000
pme3349	282	192.1	1.91	283.092	-	8-Hydroxy-2-deoxyguanosine	Nucleotide and its derivates	5160	9340	6200	10300	8460	9020	10300	8220	6520	11300	10500	10800	7240	7160	11100	11400	8590	8450	9950	10100	5690	8420	8860	8140	7820	7890
pme3351	144.1	126.1	0.82	145.074	C04076	Allysine(6-Oxo DL-Norleucine)	Amino acid derivatives	23000	8480	18700	21400	22900	24200	21700	29200	22900	35100	28300	19600	29800	26800	19100	13500	21000	16600	17100	19500	31200	37600	38300	28300	31900	29400
pme3369	315	165.1	6.19	316.058	C10176	Rhamnetin (7-O-methxyl quercetin)	Flavonol	78500	81800	77800	71900	70600	82900	83800	79500	61300	39400	21700	57900	47700	18100	26500	55100	49100	99000	111000	71800	36100	35900	16100	30500	29900	0
pme3382	160	73.9	1.21	161.069	-	N-Acetylthreonine	Amino acid derivatives	345000	338000	299000	314000	329000	313000	353000	342000	347000	431000	422000	455000	449000	439000	388000	472000	422000	381000	335000	370000	394000	419000	483000	348000	396000	382000
pme3388	189	144.2	0.68	188.127	C01924	H-HomoArg-OH	Amino acid derivatives	1670000	1820000	1790000	1690000	1730000	1670000	1630000	1910000	1800000	1980000	2060000	2140000	1720000	1810000	1390000	1500000	1550000	1440000	1260000	1720000	1800000	1760000	1680000	1880000	2100000	1830000
pme3391	479	317	2.63	479	C12139	Petunidin 3-O-glucoside	Anthocyanins	2230000	2070000	2230000	2160000	1970000	1750000	2100000	1910000	8000000	7260000	7580000	1170000	1180000	1200000	4570000	4770000	4450000	2570000	2730000	2460000	1070000	962000	1140000	743000	719000	677000
pme3392	433.1	271	2.75	433.1	-	Pelargonidin 3-O-beta-D-glucoside（Callistephin chloride)	Anthocyanins	2090000	2240000	2060000	2250000	2160000	2480000	2070000	2030000	2840000	2920000	2790000	4190000	3790000	3850000	2180000	2420000	2270000	1650000	1670000	1760000	2810000	2920000	2760000	3360000	3180000	3430000
pme3396	289	215.1	3.66	288.063	C01378	Fustin	Flavonol	912000	910000	954000	900000	956000	984000	890000	918000	861000	703000	990000	1380000	1150000	1120000	1180000	1090000	1140000	1010000	1010000	1040000	516000	465000	372000	1020000	1210000	1000000
pme3400	447.1	285.1	5.18	446.121	C05376	Sissotrin	Isoflavone	111000	127000	123000	99300	105000	124000	123000	98100	80800	73500	68200	94800	93000	96000	76900	76600	80000	421000	389000	396000	141000	150000	165000	321000	322000	305000
pme3401	345	330.2	5.59	346.069	C11620	Syringetin	Flavonol	77700	83000	77600	74000	89300	79000	82700	82400	338000	311000	166000	245000	262000	156000	83300	116000	122000	212000	215000	160000	55700	55100	39900	188000	163000	143000
pme3416	177	133.1	3.19	178.027	C09263	"Esculetin (6,7-dihydroxycoumarin)"	Coumarins	698000	734000	723000	744000	725000	681000	718000	669000	574000	507000	446000	534000	519000	502000	840000	789000	740000	840000	837000	815000	588000	572000	537000	717000	590000	687000
pme3422	207.1	192	3.45	208.037	C09265	"6-Methoxy-7,8-DihydroxyCoumarin"	Coumarins	64900	75700	65400	71300	76000	73600	75600	72300	26700	16400	23600	24100	22200	25500	54400	63500	71200	43100	42100	38800	29000	27200	31000	44200	42600	32700
pme3428	339.1	177.1	2.71	340.079	C09264	"Esculin (6,7-Dihydroxycoumarin-6-glucoside)"	Coumarins	8520000	8420000	8770000	7800000	8150000	8190000	7960000	7560000	5510000	5280000	5520000	5740000	5780000	5560000	10600000	9570000	9690000	12100000	12700000	12400000	8390000	8170000	8160000	6490000	6210000	6740000
pme3434	211.1	137.1	4.57	212.069	-	"Eudesmic acid (3,4,5-trimethoxybenzoic acid)"	Benzoic acid derivatives	16500	16000	16100	13300	20900	15500	16000	14800	63100	49700	51900	23000	23800	23100	13300	11700	12500	4560	1830	5400	19400	18900	19600	22600	23000	23200
pme3442	477.1	301.1	3.67	478.36	-	Quercetin 7-O-β-D-Glucuronide	Flavonol	191000	157000	178000	172000	179000	182000	190000	172000	278000	292000	225000	185000	196000	175000	208000	263000	214000	142000	147000	151000	292000	305000	228000	318000	287000	238000
pme3446	209.1	149.1	4.43	208	-	Sinapinaldehyde	Hydroxycinnamoyl derivatives	414000	486000	427000	471000	430000	509000	440000	498000	373000	354000	245000	410000	403000	269000	257000	342000	389000	424000	392000	362000	499000	463000	477000	475000	404000	319000
pme3453	147.1	129	4.25	148	-	p-Coumaraldehyde	Hydroxycinnamoyl derivatives	201000	224000	185000	193000	208000	187000	183000	180000	204000	201000	177000	96900	114000	113000	142000	129000	125000	177000	149000	162000	120000	113000	126000	122000	97300	141000
pme3459	317.2	281.3	7.53	316	C09066	Caffeyl alcohol	Hydroxycinnamoyl derivatives	232000	623000	358000	636000	316000	312000	630000	180000	681000	635000	378000	285000	166000	223000	1110000	1580000	1730000	1210000	1160000	1110000	271000	239000	263000	302000	332000	187000
pme3461	301.1	151	5.71	302.279	C09756	Homoeriodictyol	Flavanone	335000	319000	263000	281000	413000	317000	278000	215000	103000	117000	46300	252000	196000	145000	65700	233000	182000	436000	414000	142000	204000	149000	72600	131000	106000	57400
pme3464	285.1	164	6.81	286.084	C05334	Isosakuranetin (4'-Methylnaringenin)	Flavanone	6310000	6390000	6160000	6180000	6240000	6390000	6080000	5850000	220000	223000	204000	229000	241000	229000	484000	494000	489000	484000	490000	456000	341000	322000	307000	198000	191000	182000
pme3473	271.1	151	5.59	272.069	C09614	Butin	Flavone	36600000	36700000	36900000	37400000	36700000	35600000	36600000	34400000	7590000	7180000	6480000	17300000	16900000	15500000	2540000	2810000	2910000	2780000	2950000	2550000	21300000	20900000	18600000	6530000	6460000	5890000
pme3478	277.1	146.2	2.75	278.13	C00831	Pantetheine	Vitamins	47000	43700	34900	40200	39000	39400	47900	43700	37400	35000	41600	36100	40600	40100	37400	33100	36600	34500	35100	40200	17400	14800	15800	28300	23700	24700
pme3502	429.1	267.1	4.54	430.126	C10509	Formononetin 7-O-glucoside (Ononin)	Isoflavone	277000	292000	289000	269000	345000	305000	338000	295000	406000	407000	433000	299000	304000	359000	337000	341000	332000	433000	421000	404000	469000	457000	466000	353000	350000	338000
pme3514	301	151.1	5.08	302.043	C10105	Morin	Flavonol	21500000	21700000	22000000	21000000	21000000	22400000	22200000	21100000	11800000	10300000	5200000	16400000	13100000	7210000	6000000	12000000	12200000	18000000	17500000	8540000	11300000	8810000	4580000	14000000	11400000	6230000
pme3564	179	179	3.31	178.027	C03093	Daphnetin	Coumarins	7270000	5140000	5350000	4370000	5180000	4310000	4460000	3630000	2980000	3180000	3400000	3940000	4610000	5340000	4660000	4260000	5320000	4260000	4390000	4180000	4390000	5330000	4910000	3940000	4880000	4320000
pme3569	207.1	207.1	4.73	206.058	C09311	Scoparone	Coumarins	1010000	1030000	1110000	1140000	1070000	1090000	1060000	969000	0	0	0	0	0	0	300000	402000	356000	410000	391000	426000	291000	353000	272000	241000	232000	228000
pme3576	138.1	91.9	4.01	137.048	C00108	Anthranilic acid	Benzoic acid derivatives	382000	560000	511000	412000	599000	592000	553000	549000	247000	286000	354000	345000	332000	293000	352000	299000	386000	147000	188000	142000	591000	586000	629000	292000	294000	238000
pme3609	287	231.6	3.45	287.24	C05905	Cyanidin	Anthocyanins	17500000	15700000	16900000	17300000	16700000	18000000	16800000	14000000	25200000	24500000	26400000	22000000	21000000	20900000	26100000	25000000	19800000	20900000	20400000	19300000	16600000	14400000	16700000	23300000	21500000	23100000
pme3705	193.1	72.9	0.72	194.043	C00191	D-glucoronic acid	Carbohydrates	1160000	1140000	868000	985000	829000	937000	1110000	1160000	968000	914000	841000	1070000	1160000	1090000	677000	1080000	902000	796000	768000	718000	1200000	1350000	1040000	1650000	1850000	1940000
pme3719	165.1	74.9	0.95	166.048	-	D-Xylonic acid	Organic acids	16900000	18400000	18300000	18000000	17900000	17500000	18800000	18300000	19600000	19800000	19700000	18700000	18800000	17500000	22500000	23400000	23300000	22800000	21900000	22300000	18200000	18700000	19100000	19800000	18700000	18400000
pme3732	244.1	111.4	0.82	243.086	C00475	Cytidine	Nucleotide and its derivates	10400000	8320000	8860000	8650000	9230000	8780000	11600000	10100000	7210000	8010000	6810000	7810000	6230000	7190000	5200000	5530000	6470000	4370000	5300000	4590000	3890000	4650000	3960000	6410000	8500000	6280000
pme3825	196.2	103.9	1.21	197.069	C00355	"3,4-Dihydroxy-DL-phenylalanine"	Amino acid derivatives	5640	4490	6410	4720	2240	3070	7630	7550	5780	8430	4710	8810	0	7180	3070	4670	6580	7330	9030	6780	10100	5970	9350	9890	3510	6680
pme3835	344.2	344	1.37	345.047	C00942	"Guanosine 3',5'-cyclic monophosphate"	Nucleotide and its derivates	2490000	2480000	2560000	2400000	2600000	2720000	2700000	2250000	1130000	1100000	1100000	1350000	1330000	1340000	830000	823000	851000	1040000	1030000	899000	1130000	1030000	1100000	817000	877000	915000
pme3961	252	136.1	1.96	251.102	C00559	Deoxyadenosine	Nucleotide and its derivates	14900000	16100000	16100000	14900000	15700000	15600000	15900000	15800000	6220000	6380000	6240000	10300000	9560000	9180000	7770000	7570000	7970000	7900000	8140000	8630000	9000000	9160000	8350000	10900000	11100000	10700000
pme3965	310	178.1	2.32	311.123	-	2-(dimethylamino)guanosine	Nucleotide and its derivates	131000	133000	140000	130000	144000	135000	142000	138000	159000	158000	155000	180000	185000	181000	130000	119000	129000	124000	109000	115000	161000	155000	154000	192000	171000	186000
pme3970	243	153.1	1.2	244.07	C02067	β-Pseudouridine	Nucleotide and its derivates	596000	730000	547000	624000	620000	667000	573000	621000	761000	706000	901000	596000	673000	490000	530000	600000	586000	363000	372000	447000	440000	366000	368000	602000	447000	559000
pme3982	267.1	135.1	1.43	268.081	-	Hypoxanthine-9-β-D-arabinofuranoside	Nucleotide and its derivates	10600000	11400000	11100000	10400000	10600000	10800000	11300000	10200000	5900000	5380000	5930000	16300000	17100000	15400000	6210000	6130000	6460000	5520000	5710000	5450000	8000000	7320000	6860000	9150000	9250000	9710000
pmb3066	481.1	445.4	2.52	482.1	-	5-O-p-coumaroyl shikimic acid O-hexoside	Quinate and its derivatives	37200	54300	31000	20100	24300	28100	41900	20300	38900	38500	73000	25100	29200	27700	44700	65400	39200	46900	34800	42500	59200	54200	56800	74700	70700	73000
